1  
2  
3  
4  
5  
6  
7  
8  
9  
10  
11  
12  
13  
14

**Regulated assembly and neurosteroid modulation constrain GABA<sub>A</sub> receptor pharmacology *in vivo***

Chang Sun<sup>1</sup>, Hongtao Zhu<sup>1</sup>, Sarah Clark<sup>1</sup>, and Eric Gouaux<sup>1,2</sup>

<sup>1</sup>Vollum Institute, Oregon Health and Science University, 3232 SW Research Drive, Portland, Oregon 97239.

<sup>2</sup>Howard Hughes Medical Institute, Oregon Health and Science University, 3232 SW Research Drive, Portland, Oregon 97239.

<sup>2</sup>Correspondence to Eric Gouaux: [gouauxe@ohsu.edu](mailto:gouauxe@ohsu.edu)

## 15 **Summary**

16           Type A GABA receptors (GABA<sub>A</sub>Rs) are the principal inhibitory receptors in the brain  
17 and the target of a wide range of clinical agents, including anesthetics, sedatives, hypnotics, and  
18 antidepressants. However, our understanding of GABA<sub>A</sub>R pharmacology has been hindered by  
19 the vast number of pentameric assemblies that can be derived from a total 19 different subunits  
20 and the lack of structural knowledge of clinically relevant receptors. Here, we isolate native  
21 murine GABA<sub>A</sub>R assemblies containing the widely expressed  $\alpha_1$  subunit, and elucidate their  
22 structures in complex with drugs used to treat insomnia (zolpidem and flurazepam) and  
23 postpartum depression (the neurosteroid allopregnanolone). Using cryo-EM analysis and single-  
24 molecule photobleaching experiments, we uncover only three structural populations in the brain:  
25 the canonical  $\alpha_1\beta_2\gamma_2$  receptor containing two  $\alpha_1$  subunits and two unanticipated assemblies  
26 containing one  $\alpha_1$  and either an  $\alpha_2$ ,  $\alpha_3$  or  $\alpha_5$  subunit. Both of the noncanonical assemblies feature  
27 a more compact arrangement between the transmembrane and extracellular domains.  
28 Interestingly, allopregnanolone is bound at the transmembrane  $\alpha/\beta$  subunit interface, even when  
29 not added to the sample, revealing an important role for endogenous neurosteroids in modulating  
30 native GABA<sub>A</sub>Rs. Together with structurally engaged lipids, neurosteroids produce global  
31 conformational changes throughout the receptor that modify both the pore diameter and binding  
32 environments for GABA and insomnia medications. Together, our data reveal that GABA<sub>A</sub>R  
33 assembly is a strictly regulated process that yields a small number of structurally distinct  
34 complexes, defining a structural landscape from which subtype-specific drugs can be developed.

35

36

37

38

## 39 Main

40 Regulation of brain excitability by activation of neuronal GABA<sub>A</sub>Rs is essential for  
41 normal brain development and function<sup>1-3</sup>. Deficits in GABA<sub>A</sub>R activity are associated with  
42 health problems ranging from epilepsy to intellectual disability<sup>4</sup>. A large number of ions and  
43 small molecules modulate GABA<sub>A</sub>R activity, including Zn<sup>2+</sup> (ref. 5) and picrotoxin<sup>6</sup> as well as  
44 therapeutic agents such as benzodiazepines<sup>6-8</sup>, barbiturates<sup>8</sup>, and propofol<sup>8</sup>. Indeed, the GABA<sub>A</sub>R  
45 modulators flurazepam and zolpidem are widely used to treat insomnia. Lipophilic neurosteroids  
46 are also potent endogenous modulators of GABA<sub>A</sub>Rs. Allopregnanolone (ALP; 3 $\alpha$ -OH-5 $\alpha$ -  
47 pregnan-20-one), synthesized chiefly in the brain<sup>9-11</sup>, potentiates GABA<sub>A</sub>R activity in a subunit-  
48 dependent manner<sup>12-14</sup>, and its anxiolytic and sedative effects have proved to be effective for the  
49 treatment of postpartum depression<sup>15</sup>. In addition, ganaxolone, a synthetic mimetic of  
50 allopregnanolone, has recently entered the clinic as an anticonvulsive agent.

51 Because modulation of receptor function is dependent upon subunit composition and  
52 arrangement, a knowledge of native GABA<sub>A</sub>R architecture is crucial to understand how these  
53 different molecules elicit distinct physiological responses. However, the potential diversity of  
54 pentameric GABA<sub>A</sub>Rs is vast due to the existence of 19 different receptor subunits ( $\alpha_{1-6}$ ,  $\beta_{1-3}$ ,  $\gamma_{1-3}$ ,  
55  $\rho_{1-3}$ ,  $\delta$ ,  $\epsilon$ ,  $\pi$ , and  $\theta$ ). Moreover, studies *in vitro* suggest that variations in subunit expression levels  
56 can modify subunit stoichiometry. Despite progress in resolving the architecture of recombinant  
57 di- and tri-heteromeric GABA<sub>A</sub>Rs<sup>5,7,16-18</sup>, there is no structural understanding of the various  
58 GABA<sub>A</sub>Rs that are present in the brain. Indeed, although the presence of specific subunits in  
59 native receptor assemblies has been determined by immunoprecipitation<sup>19-21</sup>, the number and  
60 arrangement of subunits remains unknown.

61 To elucidate the ensemble of GABA<sub>A</sub>Rs that define the molecular action of endogenous  
62 and therapeutic modulators, we isolated native  $\alpha_1$  subunit-containing GABA<sub>A</sub>Rs ( $n\alpha_1$ GABA<sub>A</sub>Rs)  
63 from mouse brain using an engineered high-affinity, subunit-specific Fab fragment<sup>7</sup>. Because the  
64  $\alpha_1$  subunit is ubiquitously expressed throughout the brain, and is a subunit of both synaptic and  
65 extrasynaptic receptors, this approach enabled us to analyze 60%–80% of native GABA<sub>A</sub>Rs<sup>22-24</sup>.  
66 Furthermore, it permitted an investigation of three clinically-relevant molecules,  
67 allopregnanolone (ALP), didesethylflurazepam (DID), and zolpidem (ZOL), all of which target  
68  $\alpha_1$ -containing receptors. With isolated  $n\alpha_1$ GABA<sub>A</sub>Rs in hand, we were able to count the number

69 of  $\alpha_1$  subunits in these complexes by single-molecule fluorescence bleaching experiments,  
70 investigate protein composition by mass spectrometry, and elucidate high resolution structures of  
71  $\alpha_1$ GABA<sub>A</sub>R assemblies by single-particle cryo-EM. Our results reveal a surprisingly small  
72 number of receptor complexes, whose structures provide a framework from which targeted drugs  
73 could be developed.

#### 74 **Isolation of functional $\alpha_1$ GABA<sub>A</sub>Rs from the mouse brain**

75 We engineered the 8E3  $\alpha_1$  subunit-specific Fab fragment<sup>7</sup> to include a GFP fluorophore,  
76 affinity tag, and 3C-protease site to enable release it the affinity resin (8E3-GFP;  $K_d = 0.5$  nM;  
77 **Extended Data Figure 1**). The 8E3-GFP Fab was then used to isolate  $\alpha_1$ GABA<sub>A</sub>Rs from  
78 solubilized mouse brain tissue (excluding the cerebellum) while monitoring the purification  
79 workflow via GFP fluorescence. Detergent (lauryl maltose meopentyl glycol) treatment routinely  
80 solubilized the majority of  $\alpha_1$ GABA<sub>A</sub>Rs, accompanied by the inhibitory synapse marker  
81 neuroligin2 (**Extended Data Figure 1**). Following nearly complete capture of receptors on  
82 affinity resin (**Extended Data Figure 1**),  $\alpha_1$ GABA<sub>A</sub>Rs complexes were reconstituted into lipid-  
83 filled nanodiscs<sup>25</sup> then eluted by 3C-protease treatment. Further purification by size exclusion  
84 chromatography yielded an ensemble of  $\alpha_1$ GABA<sub>A</sub>R:Fab complexes. Radioligand binding  
85 assays showed that the purified pentameric preparations were functional and retained high-  
86 affinity flunitrazepam binding ( $K_d = 6.0 \pm 0.2$  nM (mean  $\pm$  s.e.m.); **Extended Data Figure 1**)<sup>26</sup>.  
87 Furthermore, analysis of the purified native receptor complexes by mass spectrometry identified  
88 all  $\alpha$  and  $\beta$  subunits as well as the  $\gamma_1$ ,  $\gamma_2$ , and  $\delta$  subunits, demonstrating that  $\alpha_1$ -dependent  
89 isolation captured receptors containing most of the 19 GABA<sub>A</sub>R subunits.

#### 90 **$\alpha_1$ GABA<sub>A</sub>Rs comprise three structural populations**

91 To elucidate the composition and arrangement of native receptors, we collected cryo-EM  
92 data from  $\alpha_1$ GABA<sub>A</sub>R:Fab complexes in the presence of DID, ZOL plus GABA, and ALP plus  
93 GABA (**Extended Data Table 1**), and carried out single particle analysis. The 2D class averages  
94 derived from all three datasets showed prominent Fab features at the periphery of the receptors.  
95 In contrast to a previous study on recombinant  $\alpha_1$ -containing tri-heteromeric GABA<sub>A</sub>R  
96 complexes in which all receptors contained two  $\alpha_1$  subunits<sup>7</sup>, we observed class averages with

97 only one Fab bound (**Extended Data Figure 2–4**), demonstrating the presence of receptors with  
98 a single  $\alpha_1$  subunit.

99 We subsequently used extensive 3D classification to rigorously define subunit  
100 composition and arrangement of  $n\alpha_1$ GABA<sub>A</sub>R:Fab complexes. An inverse mask of the entire  
101 transmembrane domain (TMD) allowed us to exclude structural heterogeneity in the region of  
102 the pore and enabled classification to be driven by the  $\alpha_1$ -specific Fab and *N*-glycosylation  
103 patterns unique to each  $\alpha$ ,  $\beta$ , and  $\gamma$  subunit. After combining classes with the same Fab and *N*-  
104 glycosylation features, we consistently obtained three different 3D classes: a single class with  
105 two Fabs (two-Fab) and two classes with one Fab (one-Fab) (**Extended Data Figure 2–4**). We  
106 defined the two one-Fab classes as meta-one-Fab and ortho-one-Fab according to the relative  
107 position of their  $\alpha_1$  and  $\gamma$  subunits. In all three classes from all three data sets we observed two  $\alpha$   
108 subunits, two  $\beta$  subunits, and one  $\gamma$  subunit arranged in an  $\alpha^*-\beta-\alpha-\beta^*-\gamma$  clockwise order when  
109 viewed from the extracellular side of the membrane (asterisks denote subunits adjacent to the  $\gamma$   
110 subunit). This pentameric configuration therefore represents the dominant form of  
111  $n\alpha_1$ GABA<sub>A</sub>Rs. Remarkably, we found no evidence for receptors with a  $\beta-\beta$  interface despite the  
112 high abundance of  $\beta$  subunits in native receptor assemblies, in contrast to recombinant  $\alpha_1-\beta_3-\alpha_1-$   
113  $\beta_3-\beta_3^5$  and  $\delta$ -containing<sup>18</sup> assemblies. Thus, heterologous expression of GABA<sub>A</sub> subunits appears  
114 to yield receptors in configurations that are not abundant in native brain tissue.

115 In the ALP/GABA dataset, 3D reconstructions at resolutions of 2.5 Å, 2.6 Å, and 2.6 Å  
116 were achieved for the two-Fab, ortho-one-Fab, and meta-one-Fab assemblies, respectively. This  
117 resolution was sufficient for subunit identification, small molecule positioning, and model  
118 building (**Figure 1a; Extended Data Figures 5–6; Extended Data Table 2**). The identities of  $\beta$   
119 and  $\gamma$  subunits were determined from a combination of glycosylation patterns and sidechain  
120 densities. Receptors in the two-Fab class had a tri-heteromeric  $\alpha_1^*-\beta_2-\alpha_1-\beta_2^*-\gamma_2$  arrangement,  
121 consistent with genetic<sup>27</sup>, immunohistochemistry<sup>21</sup>, and electrophysiology<sup>28</sup> data suggesting that  
122 this is the most abundant subtype in the brain.

123 In contrast, each of the meta-one-Fab and ortho-one-Fab classes contained mixed  
124 receptor ensembles that we categorized as  $\alpha_{2/3/5}^*-\beta_{1/2}-\alpha_1-\beta_{1/2}^*-\gamma_2$  and  $\alpha_1^*-\beta_{1/2}-\alpha_{2/3/5}-\beta_{1/2}^*-\gamma_2$ ,  
125 respectively. A single  $\alpha_1$  subunit in one position and either  $\alpha_2$ ,  $\alpha_3$ , or  $\alpha_5$  at the second  $\alpha$  position,

126 together with either  $\beta_1$  or  $\beta_2$  at the  $\beta$  position, yielded receptors with at least four and as many as  
127 five unique subunits in the pentameric assembly. Despite subunit ambiguity in the density maps,  
128 we evaluated the overall agreement between density map and protein sequences and modeled the  
129  $\alpha_{2/3/5}$  subunit from one-Fab structures as  $\alpha_3$  and  $\beta_{1/2}$  as  $\beta_2$  to facilitate structural comparison  
130 among datasets. The common presence of a  $\gamma_2$  subunit in  $\alpha_1$ -containing GABA<sub>A</sub>Rs suggests a  
131 favorable association between these two highly expressed subunits. Furthermore, the highly  
132 ordered *N*-glycosylation of  $\alpha$  subunits observed in the extracellular vestibule of the two-Fab  
133 class<sup>7</sup> is conserved in both one-Fab classes, and includes a polysaccharide bridge between the  $\gamma_2$   
134 subunit and the non-adjacent  $\alpha$  subunit. Intriguingly,  $\alpha_{2/3/5}$  subunits may have a fucose sugar  
135 attached to the asparagine-linked *N*-acetylglucosamine, which is absent in the  $\alpha_1$  subunit  
136 (**Extended Data Figure 6**).

137 The two one-Fab classes comprise 45% of particles in the ALP/GABA dataset and 38%  
138 particles in the ZOL/GABA dataset (**Figure 1; Extended Data Figure 2–4**), demonstrating that  
139 receptors containing only one  $\alpha_1$  subunit are more abundant than previously thought<sup>29-31</sup>. To  
140 independently measure the  $\alpha_1$  subunit stoichiometry within  $n\alpha_1$ GABA<sub>A</sub>Rs, we measured  
141 photobleaching of the GFP fluorophore in purified 8E3-GFP complexes using single-molecule  
142 total internal reflection fluorescence (TIRF) microscopy<sup>32</sup>. Roughly 50% of photobleaching  
143 events comprised a single step (**Figure 1b**), indicating that about half the purified receptors have  
144 just one  $\alpha_1$  subunit, in agreement with our cryo-EM data.

145 We used the two-Fab and ortho-one-Fab structures from the ALP/GABA dataset as  
146 paradigms to compare interdomain arrangements in receptors containing one or two  $\alpha_1$  subunits.  
147 Despite containing highly homologous subunits (74% sequence similarity between  $\alpha_1$  and  $\alpha_3$ ),  
148 we observed striking differences between the one-Fab and two-Fab complexes. The extracellular  
149 domains (ECD)s and TMDs are almost identical in  $\alpha_1$  and  $\alpha_3$  subunits in equivalent positions,  
150 having backbone RMSDs of 0.45 Å and 0.35 Å, respectively. However, when aligned by TMD,  
151 the RMSD of ECD increases to 1.05 Å, suggesting significant inter-domain displacement  
152 between these  $\alpha_1$  and  $\alpha_3$  subunits. Furthermore, both meta-one-Fab and ortho-one-Fab have  
153 markedly shorter separations between the ECD and TMD center of masses (50.1/50.6 Å for  
154 meta-one-Fab  $\alpha_3^*/\alpha_1$  and 50.9/51.0 Å for ortho-one-Fab  $\alpha_1^*/\alpha_3$ ) than two-Fab complexes  
155 (51.9/52.0 Å for  $\alpha_1^*/\alpha_1$  subunits). This observed shortening is also apparent as a reduction of

156 angles between the primary axes of the ECDs and the TMDs in one-Fab receptors (**Extended**  
157 **Data Figure 7**).

### 158 **ALP is a ubiquitous modulator of $\alpha_1$ GABA<sub>A</sub>Rs**

159 Neurosteroids, such as ALP and allotetrahydrodeoxycorticosterone (THDOC), are  
160 endogenous ligands that confer anxiolytic, sedative, hypnotic, and anesthetic properties by  
161 potently and selectively potentiating GABA<sub>A</sub>Rs, and by direct activation at higher concentrations  
162 ( $\geq 100$  nM)<sup>33-36</sup>. To investigate the molecular basis of neurosteroid modulation, we compared the  
163 structures of two-Fab, meta-one-Fab and ortho-one-Fab assemblies in complex with GABA and  
164 ALP (**Figure 2a**). In the two-Fab structure, two ALP molecules are bound in the TMD region,  
165 each approximately 60 Å ‘below’ one of the two GABA binding pockets in the ECD (**Figure**  
166 **2b**). The ALP pockets are at the interface between transmembrane helices 1 and 4 (TM1 and  
167 TM4) of an  $\alpha_1$  subunit and TM3 of the adjacent  $\beta_2$  subunit, which form an almost rectangular  
168 box lined by primarily aromatic and hydrophobic residues:  $\alpha_1$ -W245 on one side,  $\beta_2$ -Y304 and  
169  $\beta_2$ -L301 at the base, and  $\beta_2$ -L297,  $\alpha_1$ -V242 and  $\alpha_1$ -I238 on another side. Remarkably, lipid acyl  
170 chains are present on the other two long sides and the box is capped by  $\alpha_1$ -P400 and  $\alpha_1$ -Q241,  
171 the amide oxygen of the latter forming a hydrogen bond with the 3’-OH of ALP (**Figure 2c**).

172 Incorporation of ALP remodels the conformation of TMD helices, enlarging the  
173 channel’s pore compared to a recombinant  $\alpha_1\beta_3\gamma_2$  structure without neurosteroid (PDB 6I53).  
174 Local alignment of the  $\beta_2$  and  $\alpha_1^*$  TMDs in the two structures reveals a 2.7° rotation of the line  
175 connecting the C $\alpha$  atoms at the base and top of the ALP box ( $\beta_2$ -Y304 and  $\alpha_1^*$ -Q241) while the  
176 length of this line remains constant. In addition, the  $\alpha_1^*$  TMD rotates by 2.8° around an axis  
177 between the center of mass of the entire TMD and the center of mass of the  $\alpha_1^*$  TMD (**Figure**  
178 **2d**). We observed a similar but smaller effect at the  $\beta_2^*/\alpha_1$  ALP box, with an  $\alpha_1$  TMD rotation of  
179 1.8°, suggesting that the two ALP pockets in the pentamer have a different molecular  
180 pharmacology. Global TMD alignment, on the other hand, highlights a greater tilt of the M2  
181 helices with respect to the pore axis, collectively yielding an enlarged and more symmetric ion  
182 pore in our ALP-bound structure compared to that without ALP (**Figure 2e**; **Extended Data**  
183 **Figure 8**). In particular, the sidechains of the 9’-Leu residues, which are crucial for channel  
184 gating, are rotated out of the pore in the presence of ALP (**Figure 2e**).

185 Neurosteroids achieve GABA<sub>A</sub>R potentiation by enhancing the ability of agonists to gate  
186 the channel<sup>12,37,38</sup>. Such enhancement must be due to allosteric rearrangements in the GABA-  
187 binding ECDs, which we indeed observe in our structure. Specifically, global TMD alignment  
188 reveals a concerted  $\sim 2^\circ$  (between  $1.5^\circ$  and  $2.5^\circ$ ) counter-clockwise rotation of individual ECDs  
189 compared to the ALP-free structure when viewed from the extracellular side (**Extended Data**  
190 **Figure 8**). This likely accommodates expansion of the TMDs via interactions between the ECD  
191 Cys loops and TMD TM2-TM3 loops. Although GABA binding remains largely unchanged  
192 (**Extended Data Figure 8**), concerted ECD rotations may pose an additional energy barrier to  
193 GABA release, thus slowing its unbinding and increasing channel gating. Furthermore, because  
194 agonist-induced gating is known to be accompanied by counter-clockwise rotation of the ECDs<sup>6</sup>,  
195 our observed conformational changes are fully compatible with allosteric potentiation of  
196  $\alpha_1$ GABA<sub>A</sub>Rs by ALP. Thus, despite both molecular models in this structural comparison being  
197 in a desensitized state with the 2' gate closed, ALP-induced remodeling of TMDs and ECDs  
198 explains how the receptor opens more readily in the presence of ALP. Furthermore, our data  
199 suggest that direct activation by neurosteroids is mediated via the same two binding pockets, as  
200 no additional ALP molecules were resolved in samples prepared with ALP concentrations as  
201 high as 5  $\mu$ M.

202 Neurosteroids have unusually slow on- and off-rates compared to more hydrophilic  
203 ligands<sup>39,40</sup>. This behavior has been attributed to their lipophilic nature and tendency to be  
204 enriched in the membrane<sup>41</sup>, but consideration of lipids in our ALP-bound structure offers an  
205 additional explanation for this phenomenon. An annulus of lipids with distorted acyl tails  
206 completely buries ALPs in their binding sites. In total, we resolve nine lipid-like molecules at the  
207  $\beta_2^+/\alpha_1^-$  interface (+ denoting the principal face and - denoting the complementary face), three  
208 being less than 5 Å from ALP (**Figure 2f**). As a consequence, ALP molecules must coordinate  
209 with the motions of these annular lipids to secure an exit pathway from the pocket, and partially  
210 disassociated ALP molecules may effectively re-engage the receptor without leaving the pocket  
211 via the housing provided by these lipids.

212 In addition to their prevalence in the ALP binding pockets, lipids structurally engage the  
213 receptor at other sites. The greater TMD tilt in our ALP-bound structure creates five inter-  
214 subunit pockets near the center of the membrane's plane. All five pockets, including two general



215 anesthetic binding sites, are occupied with lipid tails bent like a snorkel (**Figure 2g**).  
216 Collectively, these lipids serve as small wedges that stabilize the expanded conformation of the  
217 TMD.

218 Both meta-one-Fab and ortho-one-Fab have ALP bound at their  $\beta_2^+/\alpha_3^-$  or  $\beta_2^{*+}/\alpha_3^-$   
219 pockets, demonstrating that neurosteroid binding at the  $\beta^+/\alpha^-$  interface is independent of subunit  
220 identity and arrangement within the pentamer (**Extended Data Figure 7**). Consistent with this  
221 notion, residues involved in binding ALP are conserved in all  $\beta$  and  $\alpha$  subunits. Thus, we  
222 propose that neurosteroid potentiation of all  $\alpha_1$ GABA<sub>A</sub>Rs with a  $\beta^+/\alpha^-$  interface involves a  
223 mechanism similar to the one we have described for ALP binding to the native tri-heteromeric  
224  $\alpha_1\beta_2\gamma_2$  receptor. Nevertheless, our structures suggest there may be differences in potency or  
225 efficacy at each of the neurosteroid binding sites. Although the sequences forming the immediate  
226 ALP pockets are identical, the W245 residue ( $\alpha_1$  numbering) in other  $\alpha$  subunits adopts a  
227 different sidechain conformer, and can serve as a longer and more effective lever for ALP to  
228 reshape the TMD and potentiate receptor activity, consistent with previous electrophysiology  
229 experiments<sup>42,43</sup>.

230 Strikingly, we observed similar neurosteroid densities in the ZOL/GABA dataset in the  
231 absence of added neurosteroid, which are best modeled as ALP molecules (**Extended Data**  
232 **Figure 8**). Although we did not locate any distinct neurosteroid densities in the DID dataset, this  
233 is likely due to the inferior map resolution. Analysis of our purified ZOL/GABA sample by high  
234 performance liquid chromatography and mass spectrometry confirmed the absence of  
235 neurosteroid in the buffer and lipids used for protein purification. However, the same analysis  
236 uncovered 115 ng/mL (362 nM) of neurosteroid in the ZOL/GABA cryo-EM sample (containing  
237 ~250 nM pentameric receptor), with more than 95% being ALP rather than another of the other  
238 three possible stereoisomers (**Extended Data Figure 9**). The nearly identical TMD configuration  
239 of the ALP/GABA and ZOL/GABA structures supports this chemical assignment (**Extended**  
240 **Date Figure 7**). Thus, endogenous ALP co-purifies with  $\alpha_1$ GABA<sub>A</sub>Rs and its stoichiometric  
241 presence in our native receptor structures highlights its abundance in the brain and high affinity  
242 for  $\alpha_1$ GABA<sub>A</sub>Rs relative to other endogenous neurosteroids.

## 243 **DID and ZOL augment GABA-induced rearrangements**

244 GABA<sub>A</sub>Rs are the target of a range of insomnia medicines, including flurazepam and  
245 ZOL. To investigate the molecular effects of insomnia treatments on  $\alpha_1$ GABA<sub>A</sub>Rs, we  
246 examined the interactions with either DID, the major metabolite of flurazepam<sup>44</sup> ( $K_i$   $16.9 \pm 1.7$   
247 nM), or ZOL ( $K_i$   $22.9 \pm 2.7$  nM) and  $\alpha_1$ GABA<sub>A</sub>Rs (**Figure 3a and 3b**). Both compounds  
248 engage the receptor ECD at the  $\alpha_1^{*+}/\gamma_2^-$  interface, which is spatially equivalent to the GABA  
249 pockets, each sandwiched at a  $\beta^+/\alpha^-$  interface. The binding of DID in the two-Fab dataset is  
250 reminiscent of recombinant GABA<sub>A</sub>R structures in complex with diazepam/alprazolam<sup>6</sup>. DID  
251 makes extensive interactions with the receptor, including a hydrogen bond between its carbonyl  
252 and the  $\alpha_1$ -S204 sidechain; two hydrogen bonds between its A ring chloride and the  $\alpha_1$ -H101 and  
253  $\gamma_2$ -N60 sidechains; and several  $\pi$ - $\pi$ /CH interactions with  $\alpha_1$ -F99,  $\alpha_1$ -Y159,  $\alpha_1$ -Y209, and  $\gamma_2$ -Y58  
254 (**Figure 3c**).

255 ZOL binds to the  $\alpha_1^{*+}/\gamma_2^-$  ECD interface in tri-heteromeric  $\alpha_1\beta_2\gamma_2$  receptors at roughly the  
256 same position as DID, but engages  $\alpha_1$ -H101 via  $\pi$ -CH interactions rather than a hydrogen bond.  
257 In addition, its amide oxygen forms a hydrogen bond with the  $\alpha_1$ -S204 sidechain, and the  
258 imidazole nitrogen forms a separate hydrogen bond with the  $\alpha_1$ -T206 sidechain (**Figure 3d**). We  
259 hypothesize that this hydrogen bond duet is preserved in interactions with  $\alpha_2$  and  $\alpha_3$  subunits but  
260 not the  $\alpha_5$  subunit in which a threonine residue substitutes for S204. This difference would  
261 provide an explanation for the greater than ten-fold weaker affinity of ZOL for  $\alpha_5$ -containing  
262 receptors<sup>45</sup>. Like DID, ZOL forms  $\pi$ - $\pi$  interactions with  $\alpha_1$ -Y159,  $\alpha_1$ -Y209, and  $\gamma_2$ -Y58, as well  
263 as  $\gamma_2$ -F77. The latter interaction explains why ZOL is more sensitive to the  $\gamma_2$ -F77I mutation than  
264 diazepam<sup>46</sup>. During the preparation of this manuscript, a recombinant GABA<sub>A</sub>R structure in  
265 complex with ZOL was published<sup>47</sup>, revealing a similar binding pose for ZOL in the ECD. This  
266 structure also captured ZOL in the general anesthetic binding pockets at the  $\beta_2^+/\alpha_1^-$  TMD  
267 interface using a similar ZOL concentration to that used in our study. We hypothesize that  
268 remodeling of the TMDs by endogenous ALP prevented ZOL from binding to the general  
269 anesthetic pockets in  $\alpha_1$ GABA<sub>A</sub>Rs.

270 Binding of DID or ZOL causes only moderate conformational changes in their binding  
271 pocket. We observed a slight opening of loop C due to a 1.2 Å displacement of the  $\gamma_2$ -S205 C $\alpha$ ,  
272 as well as sidechain reorganization of  $\alpha_1$ -H101,  $\gamma_2$ -Y58,  $\gamma_2$ -N60, and  $\gamma_2$ -F77, which enlarges the

273 pocket to accommodate the ligand. These subtle changes suggest that ZOL-like medications (Z-  
274 drugs) potentiate GABA<sub>A</sub>Rs via a benzodiazepine-like mechanism, namely, strengthening of the  
275  $\alpha_1^{*+}/\gamma_2^-$  interface and facilitation of GABA-induced ECD rotation<sup>6</sup>. Indeed, when the TMDs of  
276 the ZOL/GABA structure were aligned to the closed, resting structure<sup>6</sup>, the ECDs showed  
277 concerted counterclockwise rotations ranging from 2 to 5° for individual ECD centers of mass  
278 (**Figure 3e**).

279 We also observed ZOL binding to the  $\alpha_1^{*+}/\gamma_2^-$  (ortho-one-Fab) and  $\alpha_3^{*+}/\gamma_2^-$  (meta-one-Fab)  
280 ECD interfaces. Despite sequence differences, the immediate  $\alpha_3^{*+}/\gamma_2^-$  pocket shares the same  
281 chemical environment as the  $\alpha_1^{*+}/\gamma_2^-$  pocket, but the sidechains adopt different conformations.  
282 Accordingly, we observed significantly different structural consequences of ZOL binding in the  
283  $\alpha_3^{*+}/\gamma_2^-$  pocket, including a binding pose closer to loop C on the  $\alpha_3$  subunit and concerted shifts of  
284 the ligand and the protein (**Extended Data Figure 7**). As mentioned above, our data suggest that  
285  $\alpha_{2/3/5}$  subunits have a greater intrinsic bend between their ECD and TMD than  $\alpha_1$  subunits,  
286 causing different global rearrangements when incorporated into the pentamer. Although this  
287 variation in ECD/TMD coupling causes relatively small structural perturbations to orthosteric  
288 and allosteric ligand binding, it has the potential to affect channel gating and ligand modulation,  
289 which depend on inter-domain cross-talk.

290 Intriguingly, the minimum pore radius in the DID structure is 2 Å, large enough to pass  
291 dehydrated Cl<sup>-</sup> with a radius of 1.81 Å<sup>48</sup> (**Figure 3f**). The capture of this potentially conductive  
292 state, which has not been observed before, is likely due to prevention of GABA-induced  
293 desensitization (GABA was omitted during DID sample preparation) and potentiation by DID  
294 (micromolar concentrations of benzodiazepines potentiate GABA<sub>A</sub>Rs<sup>49,50</sup>). Accordingly, we  
295 observed incomplete loop C closure – the structural hallmark of GABA-dependent allosterity – in  
296 the GABA binding pockets in the DID structure.

## 297 **Conclusion**

298 Our study reveals that  $\alpha_1$ GABA<sub>A</sub>Rs comprise three structural populations: tri-  
299 heteromeric  $\alpha_1\beta_2\gamma_2$  receptors that constitute half the total population and two distinct assemblies  
300 containing one  $\alpha_1$  subunit and one  $\alpha_{2/3/5}$  subunit. Because only three distinct receptor assemblies  
301 were identified from a total of 72 possible arrangements of two  $\alpha$ , one  $\beta$ , and one  $\gamma$  subunit<sup>18</sup>, we  
302 propose that neuronal assembly of  $\alpha_1$ GABA<sub>A</sub>Rs is a highly regulated process. The finding of

303 exclusively  $\alpha$ - $\beta$ - $\alpha$ - $\beta$ - $\gamma_2$  assemblies is in contrast to the diversity of subunit combinations that are  
304 formed in recombinant expression systems, where  $\beta$ - $\beta$  interfaces and assemblies with two  $\gamma$   
305 subunits are observed<sup>18</sup>. Although our cryo-EM study validates the use of tri-heteromeric  $\alpha_1\beta_2\gamma_2$   
306 receptors as a model of  $\alpha_1$ GABA<sub>A</sub>R pharmacology, it also reveals the prevalence of mixed  $\alpha$   
307 subunit receptors in the brain and challenges the conventional practice of classifying GABA<sub>A</sub>Rs  
308 according to  $\alpha$  subunits.

309         The molecular structures of ligand- $\alpha_1$ GABA<sub>A</sub>R complexes have revealed the binding  
310 poses of the postpartum depression medication, allopregnanolone, and two insomnia drugs,  
311 didesethylflurazepam and zolpidem. Our work also highlights the conformational changes  
312 induced by neurosteroid binding to native receptors and thus the structural basis for neurosteroid-  
313 dependent positive modulation (**Figure 4**). Finally, the serendipitous finding that endogenous  
314 neurosteroids remain bound to  $\alpha_1$ GABA<sub>A</sub>Rs after isolation and purification emphasizes the  
315 importance of considering background neurosteroid modulation when investigating the  
316 pharmacology of  $\alpha_1$ GABA<sub>A</sub>Rs.

317

## 318 **Acknowledgements**

319 We thank J. Luo and A. DeBarber for mass-spec neurosteroid analysis, J. Guidry for mass-spec  
320 protein identification, D. Claxton and D. Cawley for the monoclonal antibody. We thank the use  
321 of OHSU Bioanalytical Shared Resource/Pharmacokinetics Core Facility expertise and  
322 instrumentation (Research Resource Identifier (RRID): SCR\_009963). We thank OHSU  
323 Multiscale Microscopy Core (MMC), the Pacific Northwest Cryo-EM Center (PNCC), and the  
324 cryo-EM facility at Janelia research campus for microscope use. C.S. thanks J. Myers (PNCC)  
325 and C. López (MMC) for cryo-EM training. PNCC is supported by NIH grant U24GM129547  
326 and accessed through EMSL (grid.436923.9), a DOE Office of Science User Facility sponsored  
327 by the Office of Biological and Environmental Research. This work was supported by NIH grant  
328 5R01GM10040 to E.G. and E.G. is an investigator of the Howard Hughes Medical Institute.

329

330 **Author Information**

331 Hongtao Zhu

332 Present address: Institute of Physics, Chinese Academy of Sciences, Beijing, China

333

334 **Authors and Affiliations**

335 **Vollum Institute, Oregon Health and Science University, Portland, OR, USA**

336 Chang Sun, Hongtao Zhu, Sarah Clark, Eric Gouaux

337

338 **Contributions**

339 C.S. and E.G. designed the project. C.S. prepared cryo-EM samples, carried out biochemical  
340 characterizations. C.S. and S.C. performed single-molecule photobleaching experiments. C.S.  
341 and H.Z. carried out the cryo-EM data analysis and C.S. built the molecular models. C.S. and  
342 E.G. wrote the manuscript.

343

344 **Corresponding authors**

345 Correspondence to [Eric Gouaux](#)

346

347 **Data availability**

348 The cryo-EM maps and coordinates for the native GABA receptor in complex with  
349 didesethylflurazepam and endogenous GABA (two-Fab-DID) have been deposited in the  
350 Electron Microscopy Data Bank (EMDB) under accession number EMD-29728 and in the  
351 Protein Data Bank (PDB) under accession code 8G4O. The cryo-EM maps and coordinates for  
352 the native GABA receptor in complex with zolpidem, GABA, and endogenous neurosteroids  
353 have been deposited and accessed via EMD-39727/8G4N (two-Fab-ZOL), EMD-29743/8G5H  
354 (ortho-one-Fab-ZOL), EMD-29742/8G5G (meta-one-Fab-ZOL). The cryo-EM maps and

355 coordinates for the native GABA receptor in complex with GABA, and allopregnanolone have  
356 been deposited and accessed via EMD-29350/8FOI (two-Fab-ALP), EMD-29741/8G5F (ortho-  
357 one-Fab-ALP), EMD-29733/8G4X (meta-one-Fab-ALP).

## 358 Main references

- 359
- 360 1 Lee, V. & Maguire, J. The impact of tonic GABA<sub>A</sub> receptor-mediated inhibition on  
361 neuronal excitability varies across brain region and cell type. *Front Neural Circuits* **8**,  
362 (2014).
  - 363 2 Nemeroff, C. B. The role of GABA in the pathophysiology and treatment of anxiety  
364 disorders. *Psychopharmacol. Bull.* **37**, 133–146, (2003).
  - 365 3 Engin, E., Benham, R. S. & Rudolph, U. An emerging circuit pharmacology of GABA<sub>A</sub>  
366 receptors. *Trends Pharmacol. Sci.* **39**, 710–732, (2018).
  - 367 4 Braat, S. & Kooy, R. F. The GABA<sub>A</sub> receptor as a therapeutic target for  
368 neurodevelopmental disorders. *Neuron* **86**, 1119–1130, (2015).
  - 369 5 Kasaragod, V. B., Mortensen, M., Hardwick, S. W., Wahid, A. A., Dorovykh, V.,  
370 Chirgadze, D. Y., Smart, T. G. & Miller, P. S. Mechanisms of inhibition and activation of  
371 extrasynaptic  $\alpha\beta$  GABA<sub>A</sub> receptors. *Nature* **602**, 529–533, (2022).
  - 372 6 Masiulis, S., Desai, R., Uchański, T., Serna Martin, I., Lavery, D., Karia, D.,  
373 Malinauskas, T., Zivanov, J., Pardon, E., Kotecha, A., Steyaert, J., Miller, K. W. &  
374 Aricescu, A. R. GABA<sub>A</sub> receptor signalling mechanisms revealed by structural  
375 pharmacology. *Nature* **565**, 454–459, (2019).
  - 376 7 Phulera, S., Zhu, H., Yu, J., Claxton, D. P., Yoder, N., Yoshioka, C. & Gouaux, E. Cryo-  
377 EM structure of the benzodiazepine-sensitive  $\alpha 1\beta 1\gamma 2S$  tri-heteromeric GABA<sub>A</sub> receptor  
378 in complex with GABA. *eLife* **7**, e39383, (2018).
  - 379 8 Kim, J. J., Gharpure, A., Teng, J., Zhuang, Y., Howard, R. J., Zhu, S., Noviello, C. M.,  
380 Walsh, R. M., Lindahl, E. & Hibbs, R. E. Shared structural mechanisms of general  
381 anaesthetics and benzodiazepines. *Nature* **585**, 303–308, (2020).
  - 382 9 Purdy, R. H., Morrow, A. L., Jr., P. H. M. & Paul, S. M. Stress-induced elevations of  $\gamma$ -  
383 aminobutyric acid type A receptor-active steroids in the rat brain. *Proc Nat Acad Sci USA*  
384 **88**, 4553–4557, (1991).
  - 385 10 Corpéchet, C., Young, J., Calvel, M., Wehrey, C., Veltz, J. N., Touyer, G., Mouren, M.,  
386 Prasad, V. V., Banner, C., Sjövall, J. & et al. Neurosteroids: 3 alpha-hydroxy-5 alpha-  
387 pregnan-20-one and its precursors in the brain, plasma, and steroidogenic glands of male  
388 and female rats. *Endocrinology* **133**, 1003–1009, (1993).
  - 389 11 Cheney, D. L., Uzunov, D., Costa, E. & Guidotti, A. Gas chromatographic-mass  
390 fragmentographic quantitation of 3 alpha-hydroxy-5 alpha-pregnan-20-one  
391 (allopregnanolone) and its precursors in blood and brain of adrenalectomized and  
392 castrated rats. *J. Neurosci.* **15**, 4641–4650, (1995).
  - 393 12 Lambert, J. J., Belelli, D., Hill-Venning, C. & Peters, J. A. Neurosteroids and GABA<sub>A</sub>  
394 receptor function. *Trends Pharmacol. Sci.* **16**, 295–303, (1995).
  - 395 13 Herd, M. B., Belelli, D. & Lambert, J. J. Neurosteroid modulation of synaptic and  
396 extrasynaptic GABA<sub>A</sub> receptors. *Pharmacol Ther* **116**, 20–34, (2007).

- 397 14 Smith, S. S., Shen, H., Gong, Q. H. & Zhou, X. Neurosteroid regulation of GABA<sub>A</sub>  
398 receptors: Focus on the  $\alpha$ 4 and  $\delta$  subunits. *Pharmacol Ther* **116**, 58–76, (2007).
- 399 15 Kanes, S., Colquhoun, H., Gunduz-Bruce, H., Raines, S., Arnold, R., Schacterle, A.,  
400 Doherty, J., Epperson, C. N., Deligiannidis, K. M., Riesenberger, R., Hoffmann, E.,  
401 Rubinow, D., Jonas, J., Paul, S. & Meltzer-Brody, S. Brexanolone (SAGE-547 injection)  
402 in post-partum depression: a randomised controlled trial. *Lancet* **390**, 480–489, (2017).
- 403 16 Zhu, S., Noviello, C. M., Teng, J., Walsh, R. M., Jr., Kim, J. J. & Hibbs, R. E. Structure  
404 of a human synaptic GABA<sub>A</sub> receptor. *Nature* **559**, 67–72, (2018).
- 405 17 Laverty, D., Desai, R., Uchański, T., Masiulis, S., Stec, W. J., Malinauskas, T., Zivanov,  
406 J., Pardon, E., Steyaert, J., Miller, K. W. & Aricescu, A. R. Cryo-EM structure of the  
407 human  $\alpha$ 1 $\beta$ 3 $\gamma$ 2 GABA<sub>A</sub> receptor in a lipid bilayer. *Nature*, (2019).
- 408 18 Sente, A., Desai, R., Naydenova, K., Malinauskas, T., Jounaidi, Y., Miehling, J., Zhou,  
409 X., Masiulis, S., Hardwick, S. W., Chirgadze, D. Y., Miller, K. W. & Aricescu, A. R.  
410 Differential assembly diversifies GABA<sub>A</sub> receptor structures and signalling. *Nature* **604**,  
411 190–194, (2022).
- 412 19 Benke, D., Fritschy, J. M., Trzeciak, A., Bannwarth, W. & Mohler, H. Distribution,  
413 prevalence, and drug binding profile of gamma-aminobutyric acid type A receptor  
414 subtypes differing in the  $\beta$ -subunit variant. *J. Biol. Chem.* **269**, 27100–27107, (1994).
- 415 20 Nusser, Z., Sieghart, W. & Somogyi, P. Segregation of different GABA<sub>A</sub> receptors to  
416 synaptic and extrasynaptic membranes of cerebellar granule cells. *J. Neurosci.* **18**, 1693–  
417 1703, (1998).
- 418 21 Pirker, S., Schwarzer, C., Wieselthaler, A., Sieghart, W. & Sperk, G. GABA<sub>A</sub> receptors:  
419 Immunocytochemical distribution of 13 subunits in the adult rat brain. *Neuroscience* **101**,  
420 815–850, (2000).
- 421 22 Mckernan, R. M., Quirk, K., Prince, R., Cox, P. A., Gillard, N. P., Ragan, C. I. &  
422 Whiting, P. GABA<sub>A</sub> receptor subtypes immunopurified from rat brain with  $\alpha$  subunit-  
423 specific antibodies have unique pharmacological properties. *Neuron* **7**, 667–676, (1991).
- 424 23 Mertens, S., Benke, D. & Mohler, H. GABA<sub>A</sub> receptor populations with novel subunit  
425 combinations and drug binding profiles identified in brain by  $\alpha$ 5- and  $\delta$ -subunit-specific  
426 immunopurification. *J. Biol. Chem.* **268**, 5965–5973, (1993).
- 427 24 Endo, S. & Olsen, R. W. Antibodies specific for  $\alpha$ -subunit subtypes of GABA<sub>A</sub> receptors  
428 reveal brain regional heterogeneity. *J. Neurochem.* **60**, 1388–1398, (1993).
- 429 25 Johansen, N. T., Tidemand, F. G., Nguyen, T., Rand, K. D., Pedersen, M. C. & Arleth, L.  
430 Circularized and solubility-enhanced MSPs facilitate simple and high-yield production of  
431 stable nanodiscs for studies of membrane proteins in solution. *FEBS J.* **286**, 1734–1751,  
432 (2019).
- 433 26 Benke, D., Honer, M., Michel, C. & Mohler, H. GABA<sub>A</sub> receptor subtypes  
434 differentiated by their  $\gamma$ -subunit variants: prevalence, pharmacology and subunit  
435 architecture. *Neuropharmacology* **35**, 1413–1423, (1996).
- 436 27 Barnard, E. A., Skolnick, P., Olsen, R. W., Mohler, H., Sieghart, W., Biggio, G.,  
437 Braestrup, C., Bateson, A. N. & Langer, S. Z. International Union of Pharmacology. XV.  
438 Subtypes of  $\gamma$ -aminobutyric acid<sub>A</sub> receptors: classification on the basis of subunit  
439 structure and receptor function. *Pharmacol. Rev.* **50**, 291–313, (1998).
- 440 28 Lorez, M., Benke, D., Luscher, B., Mohler, H. & Benson, J. A. Single-channel properties  
441 of neuronal GABA<sub>A</sub> receptors from mice lacking the  $\gamma$ 2 subunit. *J. Physiol.* **527** (Pt 1),  
442 11–31, (2000).

- 443 29 Benke, D., Fakitsas, P., Roggenmoser, C., Michel, C., Rudolph, U. & Mohler, H.  
444 Analysis of the presence and abundance of GABA<sub>A</sub> receptors containing two different  
445 types of  $\alpha$  subunits in murine brain using point-mutated  $\alpha$  subunits. *J. Biol. Chem.* **279**,  
446 43654–43660, (2004).
- 447 30 Pollard, S., Duggan, M. J. & Stephenson, F. A. Further evidence for the existence of  $\alpha$   
448 subunit heterogeneity within discrete  $\gamma$ -aminobutyric acid<sub>A</sub> receptor subpopulations. *J.*  
449 *Biol. Chem.* **268**, 3753–3757, (1993).
- 450 31 Duggan, M. J., Pollard, S. & Stephenson, F. A. Immunoaffinity purification of GABA<sub>A</sub>  
451 receptor  $\alpha$ -subunit iso-oligomers. Demonstration of receptor populations containing  
452  $\alpha 1\alpha 2$ ,  $\alpha 1\alpha 3$ , and  $\alpha 2\alpha 3$  subunit pairs. *J. Biol. Chem.* **266**, 24778–24784, (1991).
- 453 32 Jain, A., Liu, R., Xiang, Y. K. & Ha, T. Single-molecule pull-down for studying protein  
454 interactions. *Nat. Protoc.* **7**, 445–452, (2012).
- 455 33 Wang, M. Neurosteroids and GABA<sub>A</sub> receptor function. *Front Endocrinol* **2**, (2011).
- 456 34 Twyman, R. E. & Macdonald, R. L. Neurosteroid regulation of GABA<sub>A</sub> receptor single-  
457 channel kinetic properties of mouse spinal cord neurons in culture. *J. Physiol.* **456**, 215–  
458 245, (1992).
- 459 35 Lambert, J. J., Belelli, D., Hill-Venning, C., Callachan, H. & Peters, J. A. Neurosteroid  
460 modulation of native and recombinant GABA<sub>A</sub> receptors. *Cell Mol Neurobiol* **16**, 155–  
461 174, (1996).
- 462 36 Hosie, A. M., Clarke, L., da Silva, H. & Smart, T. G. Conserved site for neurosteroid  
463 modulation of GABA<sub>A</sub> receptors. *Neuropharmacology* **56**, 149–154, (2009).
- 464 37 Viapiano, M. S., de Novara, A. M. & de Plazas, S. F. Neurosteroid modulation of GABA  
465 binding sites in developing avian central nervous system. *Neurochem. Int.* **32**, 291–298,  
466 (1998).
- 467 38 Zhu, W. J. & Vicini, S. Neurosteroid prolongs GABA<sub>A</sub> channel deactivation by altering  
468 kinetics of desensitized states. *J. Neurosci.* **17**, 4022–4031, (1997).
- 469 39 Liu, Q.-Y., Chang, Y. H., Schaffner, A. E., Smith, S. V. & Barker, J. L.  
470 Allopregnanolone activates GABA<sub>A</sub> receptor /Cl<sup>-</sup> channels in a multiphasic manner in  
471 embryonic rat hippocampal neurons. *J. Neurophysiol.* **88**, 1147–1158, (2002).
- 472 40 Li, P., Shu, H. J., Wang, C., Mennerick, S., Zorumski, C. F., Covey, D. F., Steinbach, J.  
473 H. & Akk, G. Neurosteroid migration to intracellular compartments reduces steroid  
474 concentration in the membrane and diminishes GABA<sub>A</sub> receptor potentiation. *J. Physiol.*  
475 **584**, 789–800, (2007).
- 476 41 Shu, H. J., Eisenman, L. N., Jinadasa, D., Covey, D. F., Zorumski, C. F. & Mennerick, S.  
477 Slow actions of neuroactive steroids at GABA<sub>A</sub> receptors. *J. Neurosci.* **24**, 6667–6675,  
478 (2004).
- 479 42 Maitra, R. & Reynolds, J. N. Subunit dependent modulation of GABA<sub>A</sub> receptor function  
480 by neuroactive steroids. *Brain Res.* **819**, 75–82, (1999).
- 481 43 Belelli, D., Casula, A., Ling, A. & Lambert, J. J. The influence of subunit composition on  
482 the interaction of neurosteroids with GABA<sub>A</sub> receptors. *Neuropharmacology* **43**, 651–  
483 661, (2002).
- 484 44 Clatworthy, A. J., Jones, L. V. & Whitehouse, M. J. The gas chromatography mass  
485 spectrometry of the major metabolites of flurazepam. *Biomed. Mass Spectrom.* **4**, 248–  
486 254, (1977).
- 487 45 Sieghart, W. Structure and pharmacology of  $\gamma$ -aminobutyric acid<sub>A</sub> receptor subtypes.  
488 *Pharmacol. Rev.* **47**, 181–234, (1995).



- 489 46 Ramerstorfer, J., Furtmuller, R., Vogel, E., Huck, S. & Sieghart, W. The point mutation  
490  $\gamma 2$  F77I changes the potency and efficacy of benzodiazepine site ligands in different  
491 GABA<sub>A</sub> receptor subtypes. *Eur. J. Pharmacol.* **636**, 18–27, (2010).
- 492 47 Zhu, S., Sridhar, A., Teng, J., Howard, R. J., Lindahl, E. & Hibbs, R. E. Structural and  
493 dynamic mechanisms of GABA<sub>A</sub> receptor modulators with opposing activities. *Nat*  
494 *Commun* **13**, 4582, (2022).
- 495 48 Pauling, L. *The nature of the chemical bond*. 3rd Edition edn, (Cornell University Press,  
496 1960).
- 497 49 Birnir, B., Everitt, A. B., Lim, M. S. & Gage, P. W. Spontaneously opening GABA<sub>A</sub>  
498 channels in CA1 pyramidal neurones of rat hippocampus. *J. Membr. Biol.* **174**, 21–29,  
499 (2000).
- 500 50 Eghbali, M., Curmi, J. P., Birnir, B. & Gage, P. W. Hippocampal GABA<sub>A</sub> channel  
501 conductance increased by diazepam. *Nature* **388**, 71–75, (1997).
- 502

503

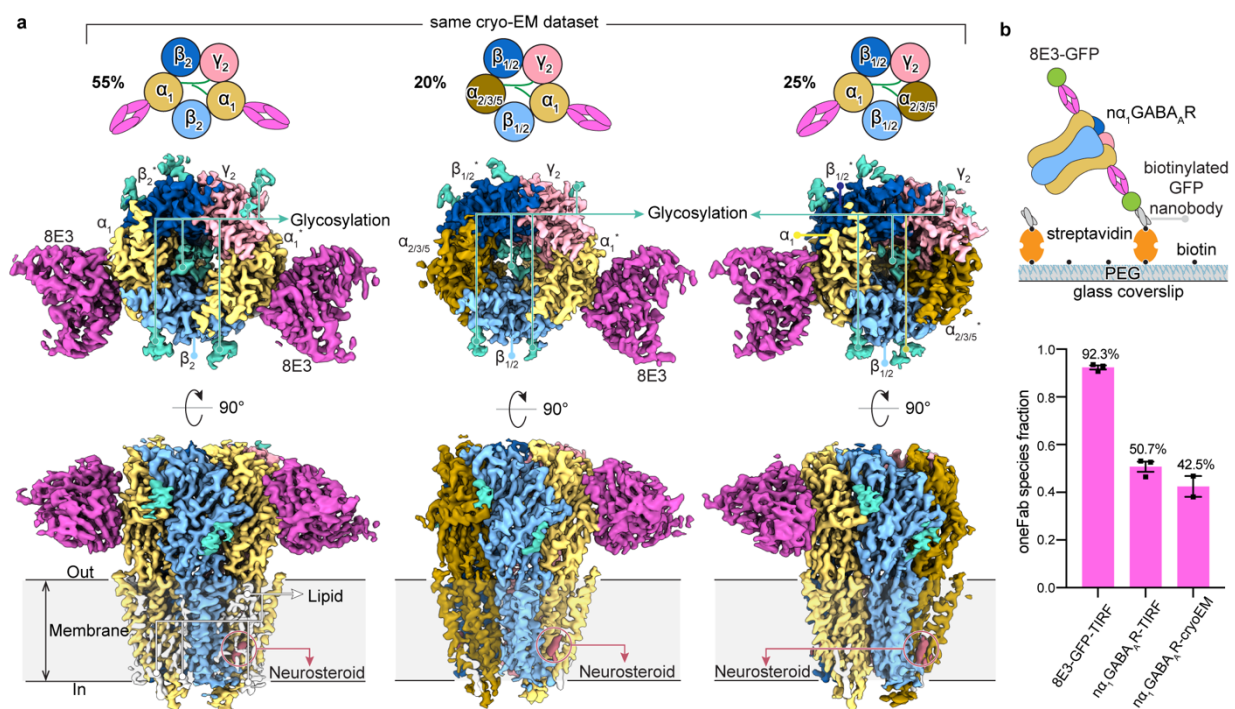

504

505 **Figure 1. The three major  $\alpha_1$ GABA<sub>A</sub>R complexes.** **a**, Cryo-EM reconstruction of two-Fab  
 506  $\alpha_1^*$ - $\beta_2$ - $\alpha_1$ - $\beta_2^*$ - $\gamma_2$ , ortho-one-Fab  $\alpha_1^*$ - $\beta_{1/2}$ - $\alpha_{2/3/5}$ - $\beta_{1/2}^*$ - $\gamma_2$  and meta-one-Fab  $\alpha_{2/3/5}$ - $\beta_{1/2}$ - $\alpha_1$ - $\beta_{1/2}^*$ - $\gamma_2$   
 507 receptor complexes (from left to right), purified from mouse brain using an  $\alpha_1$ -specific Fab. All  
 508 reconstructions processed from the ALP/GABA dataset. Percentages calculated from particles  
 509 separated by 3D classification using an inverse-TMD mask (Extended Data Figure 4). **b**, Single-  
 510 molecule TIRF photobleaching of purified  $\alpha_1$ GABA<sub>A</sub>R-GFP-Fab complexes. Top, experimental  
 511 design; bottom, distribution of photobleaching events for  $\alpha_1$ GABA<sub>A</sub>R-GFP-Fab complexes and  
 512 isolated GFP-Fab (control). Individual data points are presented as squares while standard errors  
 513 of the mean (SEM) are shown as error bars.

514

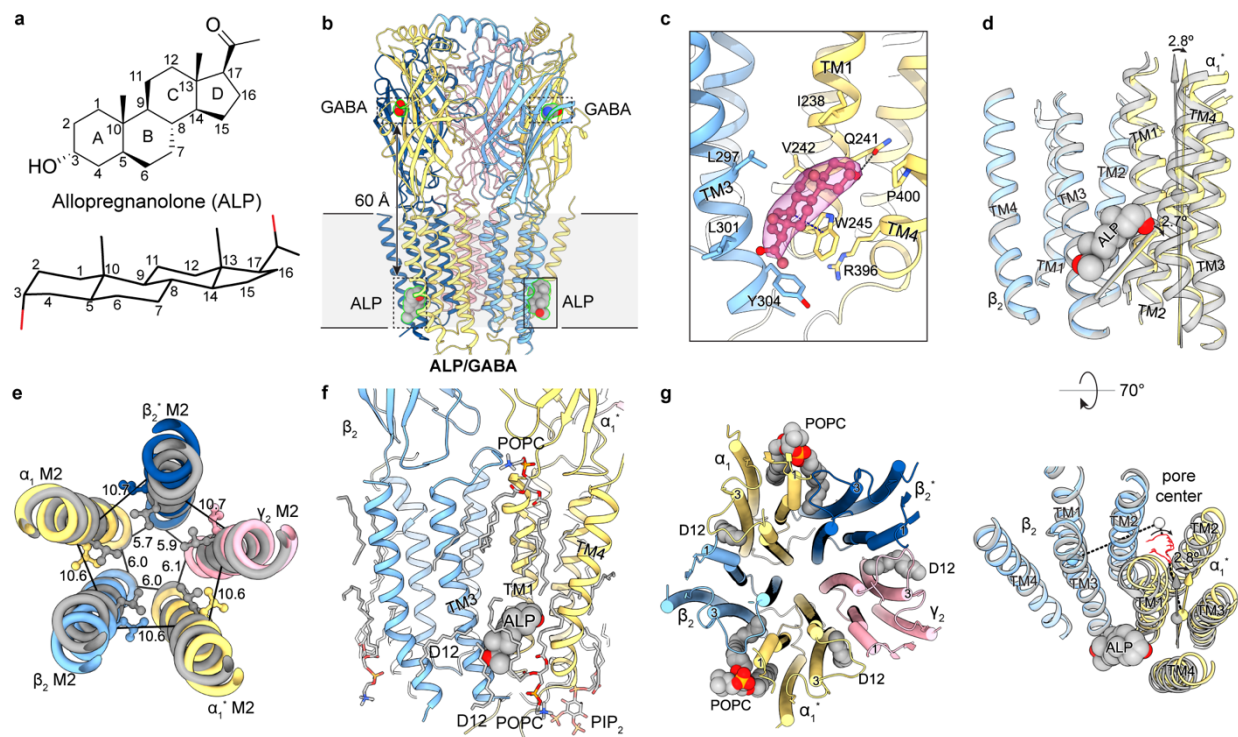

515

516 **Figure 2. ALP sculpts the conformation of the TMD.** **a**, Chemical structure of ALP. **b**,  
 517 Structural overview of  $\alpha_1^*\text{-}\beta_2\text{-}\alpha_1\text{-}\beta_2\text{-}\gamma_2$  nA<sub>1</sub>GABA<sub>A</sub>R in complex with ALP and GABA. Bound  
 518 Fabs hidden for clarity. **c**, Binding pose of ALP and ligand density in the binding pocket at the  
 519  $\beta_2^+/\alpha_1^*$ -TMD interface. **d**, Local conformational changes induced by ALP binding. Coordinates  
 520 of gray structure of a full-length  $\alpha_1\beta_3\gamma_2$  recombinant receptor in complex with GABA from PDB  
 521 6I53. Structural alignment based on the  $\beta$  subunit TMD. **e**, Global structural rearrangements  
 522 induced by ALP binding. Structural alignment based on global TMD. Distances are between 9'  
 523 gate C $\alpha$  and the -2' gate. **f**, Lipids molecules resolved in the ALP/GABA structure. **g**, Lipids  
 524 molecules with acyl tails inserted between TM1 and TM3 of adjacent subunits.

525

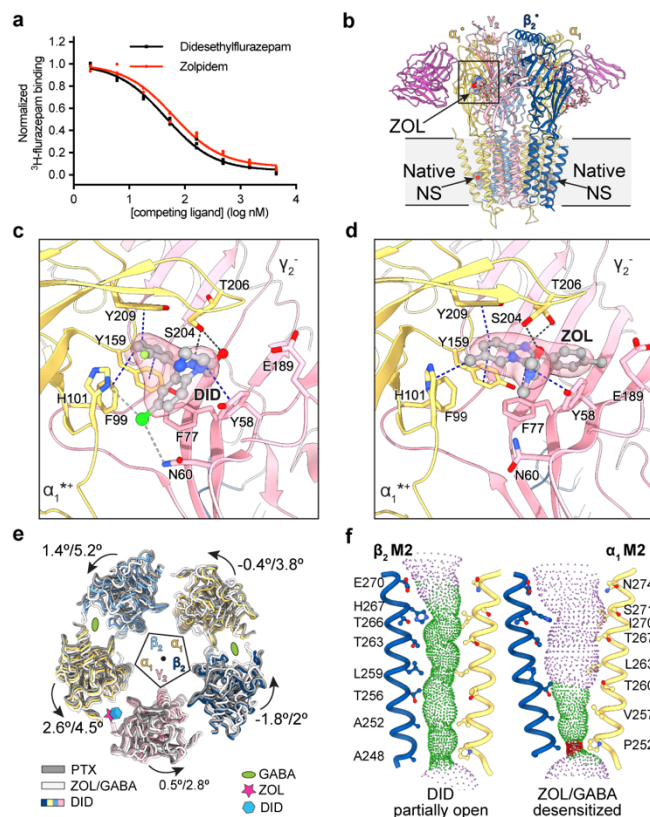

526

527 **Figure 3. DID and ZOL binding propagates conformational changes to the TMD.** **a,**  
 528 Competitive radioligand binding assay for purified  $\alpha_1$ GABA<sub>A</sub>Rs in complex with ZOL or DID.  
 529 Individual data points are plotted along with the curve fitted with the one-site model. **b,**  
 530 Structural overview of  $\alpha_1^*$ - $\beta_2$ - $\alpha_1$ - $\beta_2^*$ - $\gamma_2$   $\alpha_1$ GABA<sub>A</sub>R in complex with ZOL, GABA, and  
 531 endogenous neurosteroid. **c, d,** Binding poses of DID and ZOL, and cryo-EM ligand density.  
 532 Blue dashed lines,  $\pi$ - $\pi$ /CH interactions; black dashed lines, hydrogen bonds less than 3.5 Å  
 533 (acceptor to donor); gray dashed lines, weak hydrogen bonds between 3.5 Å and 4 Å. **e,** Impact  
 534 of ligand binding on ECD arrangement. Structures superimposed based on global TMD.  
 535 Individual ECDs displaced from center of pore by 15 Å for clarity. **f,** Pore profiles in  
 536 DID/GABA structure and ZOL/GABA structure. Pore-delineating dots colored according to pore  
 537 radius at that position: red, <1.8 Å; green, between 1.8 Å and 4 Å; blue, >4 Å.

538

539

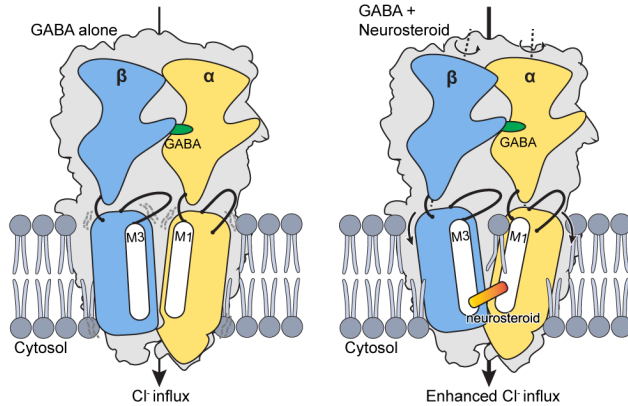

540

541 **Figure 4. Mechanism of neurosteroid potentiation.** Binding of GABA to  $\alpha_1$ GABA<sub>A</sub>Rs  
542 induces rotation of the ECD and opening of TMD pore, allowing Cl<sup>-</sup> ion influx. Neurosteroid  
543 bound in the  $\beta^+/\alpha^-$  TMD pocket serves as a diagonal brace to stabilize the open conformation of  
544 the TMD and induce additional counter-clockwise rotation of individual ECDs. Annular lipid  
545 molecules position their acyl tails between the M3 and M1 helices of adjacent subunits,  
546 contributing further stabilization. The net effect of neurosteroid binding is enhanced Cl<sup>-</sup> influx.

547

548

## 549 **Methods**

### 550 **Expression and purification of the $\alpha_1$ specific 8E3-GFP Fab**

551 The  $\alpha_1$ -specific mouse monoclonal antibody 8E3 was generated and screened as  
552 previously described<sup>1</sup>. The coding sequences of 8E3 Fab light and heavy chains were determined  
553 from hybridoma mRNA, and a construct to express the Fab portion of the antibody was designed  
554 by including sequences to encode an N-terminal GP64 signal peptide. Codons were optimized  
555 for expression in insect cells. To facilitate recombinant antibody detection and purification, a 3C-  
556 cleavage sequence, an EGFP gene, and a twin-strep II tag were added to the C-terminus of the  
557 heavy chain. Synthetic genes for both chains were then cloned into the pFastBac-Dual vector  
558 under the polyhedrin promoter. The recombinant baculovirus was prepared as previously  
559 described<sup>2</sup>. Sf9 cells at a density of 3 million per mL were infected with the recombinant  
560 baculovirus, with a multiplicity of infection of 2, and further cultured for 96 hours at 20° C. The  
561 antibody-containing supernatant was collected by a 20-minute centrifugation at 5,000 g and then  
562 the pH was adjusted to 8 with 30 mM Tris base, incubated in the cold room overnight to allow  
563 non-Fab protein precipitation, and clarified by another 20-minute centrifugation at 5,000 g. The  
564 supernatant was concentrated and buffer-exchanged three times with TBS (20 mM Tris 150 mM  
565 NaCl pH 8) using a tangential-flow concentrator equipped with a 15-kDa filter. The concentrated  
566 supernatant was then loaded onto a 15-mL streptactin column, which was washed with at least 20  
567 column volumes of TBS and eluted with 5 mM desthiobiotin in TBS. Selected fractions were  
568 pooled, concentrated, and buffer exchanged to TBS using microconcentrators with a 50-kDa  
569 cutoff. Concentrated 8E3-GFP Fab (~100  $\mu$ M) was aliquoted and stored at -80° C until use.

### 570 **Purification of $\alpha_1$ GABA<sub>A</sub>Rs from mouse brains**

571 One-month-old BL/6 mice of mixed sex (~50 mice per preparation) were used for native  
572 receptor isolation. The mice were first euthanized and decapitated. The whole brain was isolated  
573 from the skull using a laboratory micro spatula and stored in ice-cold TBS. Cerebella were  
574 removed from the whole brain, frozen in liquid nitrogen, and stored at -80° C for a separate  
575 study. After being washed twice with ice-cold TBS, brain tissue was resuspended with ice-cold  
576 TBS (1 mL per brain) supplemented with 0.2 mM phenylmethyl sulfonyl fluoride (PMSF). The  
577 suspension was processed with a loose-fit Potter-Elvehjem homogenizer for 20 full up-and-down  
578 strokes and further sonicated (1 min per 50 mL) at a setting of 6, typically at a 40 W output. The

579 suspension was centrifuged at 10,000 g for 10 minutes, resulting in a hard pellet of mainly the  
580 nuclear fraction and a "runny" soft pellet containing a significant amount of  $\alpha_1$ GABA<sub>A</sub>Rs. The  
581 supernatant was further centrifuged at 200,000 g for 45 minutes to pellet the membranes. About  
582 0.1 g of hard pellet and 0.2 g of soft pellet were obtained from one mouse brain. These  
583 membrane pellets were resuspended with an equal volume of TBS buffer containing protease  
584 inhibitors (aprotinin/leupeptin/pepstatin A/PMSF). If not used right away, the 50% membrane  
585 suspension was supplemented with 10% glycerol and snap frozen in liquid nitrogen.

586 The following membrane solubilization and affinity chromatography were all carried out  
587 at 4° C. First, MNG/CHS (10:1 w/w) stock (10% w/v) was diluted in TBS buffer containing  
588 protease inhibitors to 2.5%. Then, one volume of the 50% membrane suspension was mixed with  
589 two volumes of the diluted detergent stock and incubated for 1 hour on a platform rocker, which  
590 routinely resulted in the solubilization of ~60% of the  $\alpha_1$  subunit present in the tissue, estimated  
591 based on Western blot (**Extended Data Figure 1**). Next, Bioblock solution was added at 0.1 mL  
592 per brain to quench the naturally biotinylated proteins, and the mixture was clarified by  
593 centrifugation at 200,000 g for 1 hour. Finally, the 8E3-GFP Fab was added to the solubilized  
594 membrane to a concentration between 60 nM and 100 nM. After 1 hour incubation, 3 mL of pre-  
595 equilibrated streptactin resin was added to bind the 8E3-GFP Fab and associated  $\alpha_1$ GABA<sub>A</sub>Rs,  
596 for 2 hours in batch mode.

### 597 **On-column nanodisc reconstitution**

598 MSP2N2<sup>3</sup> or a recently engineered MSP1E3D1 variant, CSE3<sup>4</sup>, was used for on-column  
599 MSP nanodisc reconstitution. The affinity resin, bound with receptor complexes, was washed in  
600 batches, first with 20-CV of ice-cold TBS, then with 20-CV of TBS containing 0.05% MNG and  
601 0.01% brain polar lipid (Avanti). During this wash, 40 nmole MSP2N2 and 3.2  $\mu$ mole  
602 POPC:bovine brain extract (Sigma) (85:15) lipids, or 40 nmole CSE3 and 4.8  $\mu$ mole lipids were  
603 mixed to a final volume of 1 mL in TBS and incubated at room temperature for 30 minutes. The  
604 beads were transferred to an empty Econo-Pac gravity flow column to drain the buffer. Then the  
605 1 mL pre-incubated MSP:lipids were added and incubated for 1.5 hours. Next, biobeads were  
606 added to a 20x weight excess to the MNG detergent. The mixture was incubated with a rotator in  
607 the cold room for at least 4 hours. The biobead/resin mixture was washed with 20-CV of ice-cold  
608 buffer to remove unbound empty nanodiscs.

609 Two approaches were used to elute reconstituted nanodiscs: competitive ligand elution  
610 and protease cleavage. For ligand elution, 0.5 CV 5 mM desthiobiotin dissolved in TBS was  
611 incubated with the streptactin superflow resin for 10 minutes before gravity elution, which was  
612 repeated for a total of 6 times. In the case of 3C cleavage, 0.1 mg 3C protease was first diluted to  
613 50  $\mu\text{g}/\text{mL}$  with 2 mL TBS and added to the resin. After a 2-hour incubation in the cold room, the  
614 elution was collected, and the column was further washed three times with 2 mL TBS to improve  
615 the protein yield. 3C protease cleavage offered better protein purity and was used for the  
616 zolpidem and the allopregnanolone samples. Pooled elution was concentrated to about 0.5 mL  
617 using a 50-kDa cutoff centricon, regardless of the elution methods. The concentrated sample was  
618 then injected into a Superose 6 column pre-equilibrated with TBS supplemented with 1 mM  
619 GABA and other ligands. Selected fractions corresponding to the  $\alpha_1\text{GABA}_A\text{R}:\text{Fab}$  complex  
620 were combined and concentrated to about 0.1 mg/mL using a centricon with a 50-kDa cutoff.

### 621 **Mass-spec protein identification**

622 The protein mass-spec analysis was carried out as previously described.<sup>5</sup> The native  
623 receptor samples were diluted into 100  $\mu\text{l}$  1% SDS, reduced with Tris (2-carboxyethyl)  
624 phosphine hydrochloride (TCEP), and alkylated with iodoacetamide. Proteins were then  
625 extracted with methanol-chloroform, mixed with 30  $\mu\text{l}$  of 20  $\mu\text{g}/\text{mL}$  trypsin dissolved in 50 mM  
626 ammonium bicarbonate, and incubated overnight at 37 °C. The next day, the solvent from the  
627 trypsin digestion was evaporated using a speed vac. The resulting pellet was resuspended in 20  $\mu\text{l}$   
628 of 2% acetonitrile (ACN) and 0.1% formic acid (FA) for LC-MS. The sample was run on a  
629 Dionex U3000 nanoflow system coupled to a Thermo Fusion mass spectrometer. Each sample  
630 was subjected to a 65-min chromatographic method using a gradient from 2–25% acetonitrile in  
631 0.1% formic acid (ACN/FA) for 16 min; from 25% to 35% ACN/FA for an additional 15 min,  
632 from 35% to 50% ACN/FA for an additional 4 min, a step to 90% ACN/FA for 4 min and a re-  
633 equilibration into 2% ACN/FA. Chromatography was carried out in a 'trap-and-load' format  
634 using a PicoChip source (New Objective); trap column C18 PepMap 100, 5  $\mu\text{m}$ , 100 A, and the  
635 separation column was PicoChip REPROSIL-Pur C18-AQ, 3  $\mu\text{m}$ , 120 A, 105 mm. The entire run  
636 was at a flow rate of 0.3  $\mu\text{l}/\text{min}$ . Electrospray was achieved at 1.9 kV. The MS1 scans were  
637 performed in the Orbitrap with a resolution of 240,000. Data-dependent MS2 scans were  
638 performed in the Orbitrap using High Energy Collision Dissociation (HCD) of 30% using a  
639 resolution of 30,000. Data analysis was performed using Proteome Discoverer 2.3 using



640 SEQUEST HT scoring. The static modification included dynamic modification of methionine  
641 oxidation (+15.9949) and a fixed modification of cysteines alkylation (+57.021). Parent ion  
642 tolerance was 10 ppm, fragment mass tolerance was 0.02 Da, and the maximum number of  
643 missed cleavages was set to 2. Only high-scoring peptides were considered, using a false  
644 discovery rate (FDR) of 1%.

#### 645 **Isotope-dilution quantification of allopregnanolone using LC-MS/MS**

646 Neurosteroids (allopregnanolone, epipregnanolone, isopregnanolone, pregnanolone) and  
647 isotope-labeled internal standard allopregnanolone-d5 were purchased from Toronto Research  
648 Chemicals (Toronto, ON, Canada). The O-(3-trimethylammonium-propyl) hydroxylamine  
649 quaternary amonoxo (QAO) reagent used for derivatization was in the form of Amplifex Keto  
650 reagent kit from AB Sciex (Framingham, MA). Solvents for liquid chromatography-tandem mass  
651 spectrometry (LC-MS/MS) analysis were from VWR (Tualatin, OR).

652 Neurosteroid stocks and internal standard (INST) were prepared in methanol. Stocks (5  
653  $\mu\text{L}$ ) and the INST allopregnanolone-d5 (5  $\mu\text{L}$ ) were mixed with PBS (95  $\mu\text{L}$ ) to prepare standard  
654 samples with final concentrations ranging from 0.05 to 100 ng/ml. All standards and samples  
655 were treated with 1000  $\mu\text{l}$  of acetonitrile, vortexed and mixed using Benchmark Multi-Thermo  
656 heat/shaker at 1500 rpm at 22°C for 5 mins, and centrifuged to remove protein at 12,000 g for 5  
657 mins. The supernatant was dried under vacuum and then treated with 75  $\mu\text{l}$  of derivatization  
658 reagent. The keto moiety was derivatized with QAO reagent to form a cationic oxime derivative  
659 to enable highly sensitive LC-ESI-MS/MS quantification of neurosteroids. The working  
660 derivatization reagent was prepared according to vendor instructions. The derivatized samples  
661 were diluted 1:4 with 5% acetic acid in methanol before LC-MS/MS analysis. The supernatant  
662 was placed in sample vials for analysis by LC-MS/MS using an injection volume of 5  $\mu\text{l}$ . The  
663 lower limit of quantification of allopregnanolone was 75 pg/ml, with an accuracy of 101% and a  
664 precision of 2.2%.

665 The samples with INST were analyzed using a Sciex 4000 QTRAP hybrid/triple  
666 quadrupole linear ion trap mass spectrometer (Foster City, CA) with electrospray ionization  
667 (ESI) in the positive mode. The mass spectrometer was interfaced to a Shimadzu HPLC system  
668 (Columbia, MD) with SIL-20AC XR auto-sampler, LC-20AD XR LC pumps, and CTO-20AC  
669 column oven. Compounds were quantified with multiple reaction monitoring (MRM). The

670 MS/MS transitions used were optimized by infusion of pure derivatized compounds with method  
671 settings, as presented in the table below. The bold transitions were used for quantification, with  
672 other transitions used for peak qualification to ensure method specificity. Allopregnanolone was  
673 separated from interferents using a Luna 5u C8(2) 50x2 mm column (Phenomenex) kept at 35 °C  
674 using a column oven. The gradient mobile phase was delivered at a flow rate of 0.8 ml/min and  
675 consisted of two solvents: solvent A (0.1% formic acid in water) and solvent B (0.1% formic  
676 acid in acetonitrile). The initial concentration of solvent B was 20%, followed by a linear  
677 increase to 60% B in 10 min, then to 95% B in 0.1 min, held for 3 minutes, decreased back to  
678 starting 20% B over 0.1 min, and then held for 2 min. The retention time was 3.99 min for  
679 allopregnanolone and pregnanolone, 3.64 min for isopregnanolone, and 3.61 min for  
680 epipregnanolone. Data were acquired using Analyst 1.6.2 and analyzed with MultiQuant 3.0.3  
681 software.

682 To further distinguish allopregnanolone and pregnanolone, a different HPLC condition  
683 was used. In this case, a Poroshell 120 EC-C18 100x2.1 mm 2.7um column (Agilent) was kept at  
684 35 °C using a column oven. The gradient mobile phase was delivered at a flow rate of 0.4  
685 ml/min (0–5.9min), 0.2ml/min (6.0–8.9min), and 0.4ml/min (9–15min), and consisted of two  
686 solvents, A: 0.1% formic acid in water, B: 0.1% formic acid in acetonitrile. The initial  
687 concentration of solvent B was 30%, followed by a linear increase to 52% B in 6.5 min, held for  
688 2.5min, then to 95% B in 0.1 min, held for 2.9 minutes, decreased back to starting 30% B over  
689 0.1 min, and then held for 2.9 min. The retention time for allopregnanolone was 6.4 min,  
690 pregnenolone was 6.2 min, and 3 $\alpha$ -allopregnanolone-d5 was 6.3 min.

| Q1 mass      | Q3 mass      | Dwell Time (msec) | ID                              | DP        | EP        | CE        | CXP       |
|--------------|--------------|-------------------|---------------------------------|-----------|-----------|-----------|-----------|
| 433.3        | 374.3        | 200               | QAO-ALLOPREGNANOLONE            | 71        | 10        | 35        | 14        |
| 433.3        | 58           | 200               | QAO- ALLOPREGNANOLONE           | 71        | 10        | 129       | 8         |
| <b>433.3</b> | <b>126.1</b> | <b>200</b>        | <b>QAO- ALLOPREGNANOLONE</b>    | <b>71</b> | <b>10</b> | <b>53</b> | <b>12</b> |
| <b>438.3</b> | <b>126</b>   | <b>200</b>        | <b>QAO- ALLOPREGNANOLONE-d5</b> | <b>76</b> | <b>10</b> | <b>55</b> | <b>18</b> |

691

692 **Single-molecule photobleaching of  $\alpha_1$ GABA<sub>A</sub>R-Fab complexes**

693 Coverslips and glass slides were extensively cleaned, passivated, and coated with  
694 methoxy polyethylene glycol (mPEG) and 2% biotinylated PEG as previously described<sup>6</sup>. A  
695 flow chamber was created by drilling 0.75 mm holes in the quartz slide and placing double-sided

696 tape between the holes. A coverslip was placed on top of the slide, and the edges were sealed  
697 with epoxy, creating small flow chambers. A concentration of 0.25 mg/mL streptavidin was then  
698 applied to the slide, incubated for 5 minutes, and washed off with buffer consisting of 50 mM  
699 Tris, 50 mM NaCl and 0.25 mg/mL bovine serum albumin (BSA), pH 8.0. Biotinylated anti-GFP  
700 nanobody at 7.5  $\mu\text{g/mL}$  was applied to the slide, incubated for 10 minutes, and washed off with  
701 30  $\mu\text{L}$  buffer A (20 mM Tris, 150 mM NaCl, pH 8) supplemented with 0.2 mg/mL BSA.  
702  $\alpha_1\text{GABA}_A\text{R}$ -Fab complexes in nanodiscs were eluted from the streptactin-XT resin with biotin  
703 instead of 3C protease cleavage to preserve the GFP moiety. The sample was further FSEC-  
704 purified, and the peak corresponding to the complex was hand collected, which separated the  
705 native receptor from free Fab. The sample was diluted 1:30 to about 50 pM based on  
706 fluorescence quantitation, applied to the chamber, and incubated for 5 minutes before being  
707 washed off with 30  $\mu\text{L}$  of buffer A. The chamber was immediately imaged using a Leica DMi8  
708 TIRF microscope with an oil-immersion 100x objective. Images were captured using a back-  
709 illuminated EMCCD camera (Andor iXon Ultra 888) with a 133 x 133  $\mu\text{m}$  imaging area and a 13  
710  $\mu\text{m}$  pixel size. This 13  $\mu\text{m}$  pixel size corresponds to 130 nm on the sample due to the 100x  
711 objective.

712 Photobleaching movies were acquired by exposing the imaging area for 180 seconds.  
713 Single-molecule fluorescence time traces of  $\alpha_1\text{GABA}_A\text{R}$ -Fab were generated using a custom  
714 python script. Each trace was manually scored as having one to three bleaching steps or was  
715 discarded if no clean bleaching steps could be identified. A total of ~450 molecules were  
716 evaluated from three separate movies. Scoring was verified by assessing the intensity of the spot;  
717 on average, the molecules that bleached in 2 steps were twice as bright as those that bleached in  
718 1 step.

### 719 **Scintillation proximity assay**

720 YSI Copper SPA beads from PerkinElmer were used to capture the  $\alpha_1\text{GABA}_A\text{R}$  in  
721 nanodisc via the MSP His-tag. Tritiated flunitrazepam from PerkinElmer was used as the  
722 radioligand, and clorazepate was used as the competing ligand to estimate background. During  
723 the ligand binding assay setup,  $\alpha_1\text{GABA}_A\text{R}$  in nanodisc was first mixed with SPA beads and  
724 radioligand (2x bead) while the ligand of different concentrations (2x ligand) and competing  
725 ligand (2x background) were prepared using serial dilution. Then, an equal volume of 2x bead

726 was mixed with 2x ligand (in triplicate) or 2x background in a 96-well plate. The final  
727 concentrations were 0.5 mg/mL for SPA beads, ~1 nM for native receptors, 10 nM for <sup>3</sup>H-  
728 flunitrazepam, and 0.5 mM for clorazepate in the background wells only. The plate was then read  
729 with a MicroBeta TriLux after a 2-hour incubation. Specific counts were then imported into  
730 GraphPad and analyzed using a one-site competition model.

### 731 **Negative-stain electron microscopy**

732 Purified  $\alpha_1$ GABA<sub>A</sub>R:Fab complex in nanodiscs was first diluted with TBS to a  
733 concentration of ~0.05 mg/mL. Continuous carbon grids were glow-discharged for 60 seconds at  
734 a current of 15 mA. A protein sample (5  $\mu$ L) was applied to the carbon side of the grid held with  
735 a fine-tip tweezer and incubated for 10–30 seconds. The excessive sample was then wicked away  
736 from the side with a small piece of filter paper. The grid was quickly washed with 5  $\mu$ L  
737 deionized water, followed by side-wicking, which was repeated for a total of three times.  
738 Immediately afterward, the grid was incubated with 5  $\mu$ L 0.75% uranium formate for 45 seconds,  
739 wicked several times from the side, and dried for at least 2 minutes at room temperature.

### 740 **Cryo-EM sample preparation and data acquisition**

741 We employed a specific setup to prepare grids under different buffer and ligand  
742 conditions. First, buffers containing 10x ligand or additive were first prepared and dispensed in  
743 0.5  $\mu$ L aliquot into PCR tubes. Then, 5  $\mu$ L purified  $\alpha_1$ GABA<sub>A</sub>R:Fab complex was added and  
744 quickly mixed by pipetting. Within 10 seconds, a 2.5  $\mu$ L sample was applied to a glow-  
745 discharged (30 seconds at 15 mA) 200 mesh gold Quantifoil 2/1 grid overlaid with 2-nm  
746 continuous carbon and incubated for 30 seconds. The grid was blotted with a Mark IV Vitrobot  
747 under 100% humidity at 16 °C and flash-frozen in liquid ethane. For the didesethylflurazepam  
748 sample, no GABA was included during the purification, and the didesethylflurazepam (2  $\mu$ M)  
749 was added prior to vitrification. For the zolpidem sample, 1 mM GABA was included throughout  
750 the purification, and 5  $\mu$ M zolpidem was added prior to vitrification using the above-mentioned  
751 PCR tube method. For the allopregnanolone sample, 1 mM GABA and 5  $\mu$ M allopregnanolone  
752 were included from the membrane solubilization to the final size-exclusion chromatography.

753 Cryo-EM data were collected on a 300-keV Titan Krios equipped with a BioQuantum  
754 energy filter at either PNCC or the Janelia cryo-EM facility. Data acquisition was automated  
755 using serialEM: defoci ranged between 0.9 to 2.5  $\mu$ m, holes with suitable ice thickness were

756 selected with the hole finder and combined to produce multishot-multihole targets, which  
757 allowed the acquisition of six movies per hole in each of the neighboring nine holes. These  
758 movies were captured with a K3 direct electron detector. A total dose of 50 electron/Å<sup>2</sup> was  
759 fractionated into 40 frames, with a dose rate of about 15 electron/(pixel\*second) for non-CDS  
760 mode or 7 electron/(pixel\*second) for CDS mode (**Extended Data Table 1**).

### 761 **Cryo-EM data analysis**

762 Super-resolution movies were imported to cryosparc<sup>7</sup> v 3.3.1 and motion corrected using  
763 cryosparc's patch motion correction with the output Fourier cropping factor set to ½. Initial  
764 contrast transfer function (CTF) parameters were then calculated using cryosparc's patch CTF  
765 estimation. For each dataset, 2D class averages of particles picked by glob-picker from ~1000  
766 micrographs were used as templates for the template picker. One round of 2D classification and  
767 several rounds of heterogeneous refinement seeded with *ab initio* models generated within  
768 cryosparc were used to select GABA<sub>A</sub>R particles, ranging from 4 to 6 million particles for our  
769 datasets. A non-uniform refinement (NU-Refinement) was performed to align these particles to a  
770 consensus structure. Two downstream strategies were used for our datasets, as subsequently  
771 described.

772 **Data processing strategy #1.** Bin 1 GABA<sub>A</sub>R particles, both images (360x360) and the  
773 star file converted using pyem<sup>8</sup>, were ported into RELION<sup>9</sup> 3.1. Then a 3D auto refinement job  
774 with local search (angular sampling of 1.8 degree) was carried out to fine tune the particle poses  
775 in RELION. The refined structure, similar to that generated by cryosparc, had relatively weaker  
776  $\gamma$  subunit transmembrane helices, which was reported previously<sup>10</sup>. To tackle this issue, we  
777 prepared a nanodisc mask in Chimera<sup>11</sup> and carried out 3D classification without alignment (15  
778 classes, T=20) using that mask. The 3D classification can robustly give classes with much  
779 stronger transmembrane helices of the  $\gamma$  subunit. Those selected particles were imported into  
780 cryosparc and further refined using NU-Refinement with both defocus refinement and per-group  
781 CTF refinement options turned on. The consensus structure was a two-Fab bound structure, but  
782 earlier data processing revealed one-Fab species' presence. Therefore, a 3D classification job was  
783 used with a mask focusing on the two binding sites of 8E3 Fab to isolate the one-Fab species.  
784 The one-Fab and two-Fab particles were separately refined with NU-Refinement and further  
785 refined with local refinement.

786           **Data processing strategy #2.** In this strategy, the heterogeneity in Fab binding was  
787 addressed upstream in the data processing pipeline. Like strategy #1, GABA<sub>A</sub>R particles, at bin3  
788 or 120x120, were imported into RELION for focused 3D classification. A reverse mask was  
789 prepared in cryosparc which only excluded the transmembrane domain to allow for Fab binding  
790 at all possible positions. 3D classification (10 classes, T=20) gave clear two-Fab and one-Fab  
791 classes, and classes with incomplete Fab. Further 3D classification on these incomplete Fab  
792 particles produced only incomplete Fab classes, which led us to believe they were damaged  
793 particles and should be excluded from downstream processing. The two-Fab particles and the  
794 one-Fab particles, on the other hand, were imported into cryosparc, re-extracted at bin1, and  
795 separately refined with NU-Refinement. Still, we saw weak transmembrane helices for the  $\gamma$   
796 subunit for the one-Fab and the two-Fab populations. To tackle this issue, instead of the 3D  
797 classification in RELION, we used the 3D classification (beta) job in cryosparc with a nanodisc  
798 mask, which was less robust but faster. Classes with stronger transmembrane helices were then  
799 combined and refined with NU-Refinement and finished with local refinement.

800           Global sharpening worked sub-optimally for our  $\alpha_1$ GABA<sub>A</sub>R structures because of the  
801 local resolution variation and the lower signal-to-noise ratio for the transmembrane domain. The  
802 best method to sharpen our maps was achieved with LocScale<sup>12</sup>, which was used to represent  
803 some of our structures in **Figure 1**. DeepEMhancer<sup>13</sup> can yield comparable sharpening for the  
804 protein but not for the annulus lipids.

### 805 **Subunit identification, model building, refinement, and validation**

806           Due to the subunit specificity of 8E3-Fab, the subunit with 8E3-Fab bound is defined as  
807  $\alpha_1$ . The remaining subunits can be easily classified as  $\alpha$ ,  $\beta$ , or  $\gamma$  from each subunit's  
808 characteristic *N*-linked glycosylation patterns. It was clear that all 3D classes obtained are  $\alpha$ - $\beta$ - $\alpha$ -  
809  $\beta$ - $\gamma$ , clockwise, when viewed from the extracellular side of the membrane. Given the relative  
810 subunit abundance from earlier studies, we used  $\alpha_1$ - $\beta_2$ - $\alpha_1$ - $\beta_2$ - $\gamma_2$  as the starting model of the two-  
811 Fab class. We then examined the cryo-EM density maps to test our assignment in the context of  
812 sequence information. Specifically, we looked at regions where the sidechain can be  
813 unambiguously assigned and positions where a difference of more than 3 carbon atoms or one  
814 sulfur atom was found within the subunit group. Regarding the non- $\alpha_1$   $\alpha$  subunit in the one-Fab  
815 classes, we further limited our scrutiny to positions showing no significant conformational

816 differences in the corresponding two-Fab structure to ensure the observed density difference was  
817 caused by the chemical identity of underlying residues.

818 For each dataset, the two-Fab bound  $\alpha_1$ GABA<sub>A</sub>R model was built first. The starting  
819 structures used were Alpha-fold<sup>14</sup> models of mouse GABA<sub>A</sub>R subunits and the best 8E3 Fab  
820 model generated with Rosetta<sup>15</sup>. These individual chains were first docked into the unsharpened  
821 cryo-EM density maps using chimera's fit-in-map tool to assemble the full receptor-Fab  
822 complex. The full complex was then edited to remove unresolved portions and refined  
823 extensively to achieve better model-map agreement in Coot<sup>16</sup>. *N*-glycosylation was modeled  
824 using Coot's carbohydrate module. Lipid and lipid-like molecules, including POPC, PIP2,  
825 dodecane, and octane, were modeled using the CCP4 monomer library. New ligands included in  
826 this study, including their optimized geometry and constraint, were generated using  
827 phenix.elbow<sup>17</sup>. After the initial modeling, multiple runs of phenix.real\_space\_refinement<sup>18</sup> and  
828 editing in Coot were carried out to improve the model quality.

829 The optimized two-Fab GABA<sub>A</sub>R structure was used as the starting model for one-Fab  
830 GABA<sub>A</sub>R structures. Although the one-Fab population likely consists of a mix of  $\alpha_{2/3/5}$  subunits,  
831 we decided to use  $\alpha_3$  for the modeling because of its best overall agreement with the density  
832 maps. The two-Fab structure was first docked into the one-Fab cryo-EM map using the "fit in  
833 map" tool of chimerax<sup>19</sup>. Then the aligned structure was edited in Coot to remove the extra-Fab,  
834 replaced and renumbered the  $\alpha_1$  sequence with the  $\alpha_3$  sequence. This edited structure was further  
835 fitted and refined in Coot, first with secondary structure restraints generated with ProSMART<sup>20</sup>,  
836 and then without the restraints. Furthermore, certain residues and lipids were removed due to less  
837 clear density, and the glycosylation trees were remodeled. Similarly, this initial model was  
838 subjected to multiple runs of phenix.real\_space\_refinement and editing in Coot.

839

840 **Animal use statement**

841 Mouse carcass donated from other labs of the Vollum Institute were used to establish and  
842 optimize the native GABA<sub>A</sub> receptor isolation workflow. The quantity of purified native receptor  
843 from each mouse was estimated using the fluorescence from the recombinant antibody fragment,  
844 which was then extrapolated to give the minimum number required for cryo-EM and  
845 biochemical analysis. For each native GABA<sub>A</sub> receptor preparation, 50 one-month-old (4–6  
846 weeks) C57BL/6 mice (both male and female) were ordered from Charles River Laboratories.  
847 No randomization, blinding or experimental manipulations were performed on these animals. All  
848 mice were euthanized under Institutional Animal Care and Use Committee (IACUC) protocols,  
849 consistent with the recommendations of the Panel on Euthanasia of the American Veterinary  
850 Medical Association (AVMA) and carried out only by members of the E.G. laboratory approved  
851 on IACUC protocol TR03\_IP00000905.

852

853 **Cell line statement**

854 Sf9 cells for generation of baculovirus and expression of recombinant antibody fragment are  
855 from Thermo Fisher (12659017, lot 421973). The cells were not authenticated experimentally for  
856 these studies. The cells were tested negative for Mycoplasma contamination using the  
857 CELLshipper Mycoplasma Detection Kit M-100 from Bionique.

858

859

860

861



## 862 Extended Data Figures

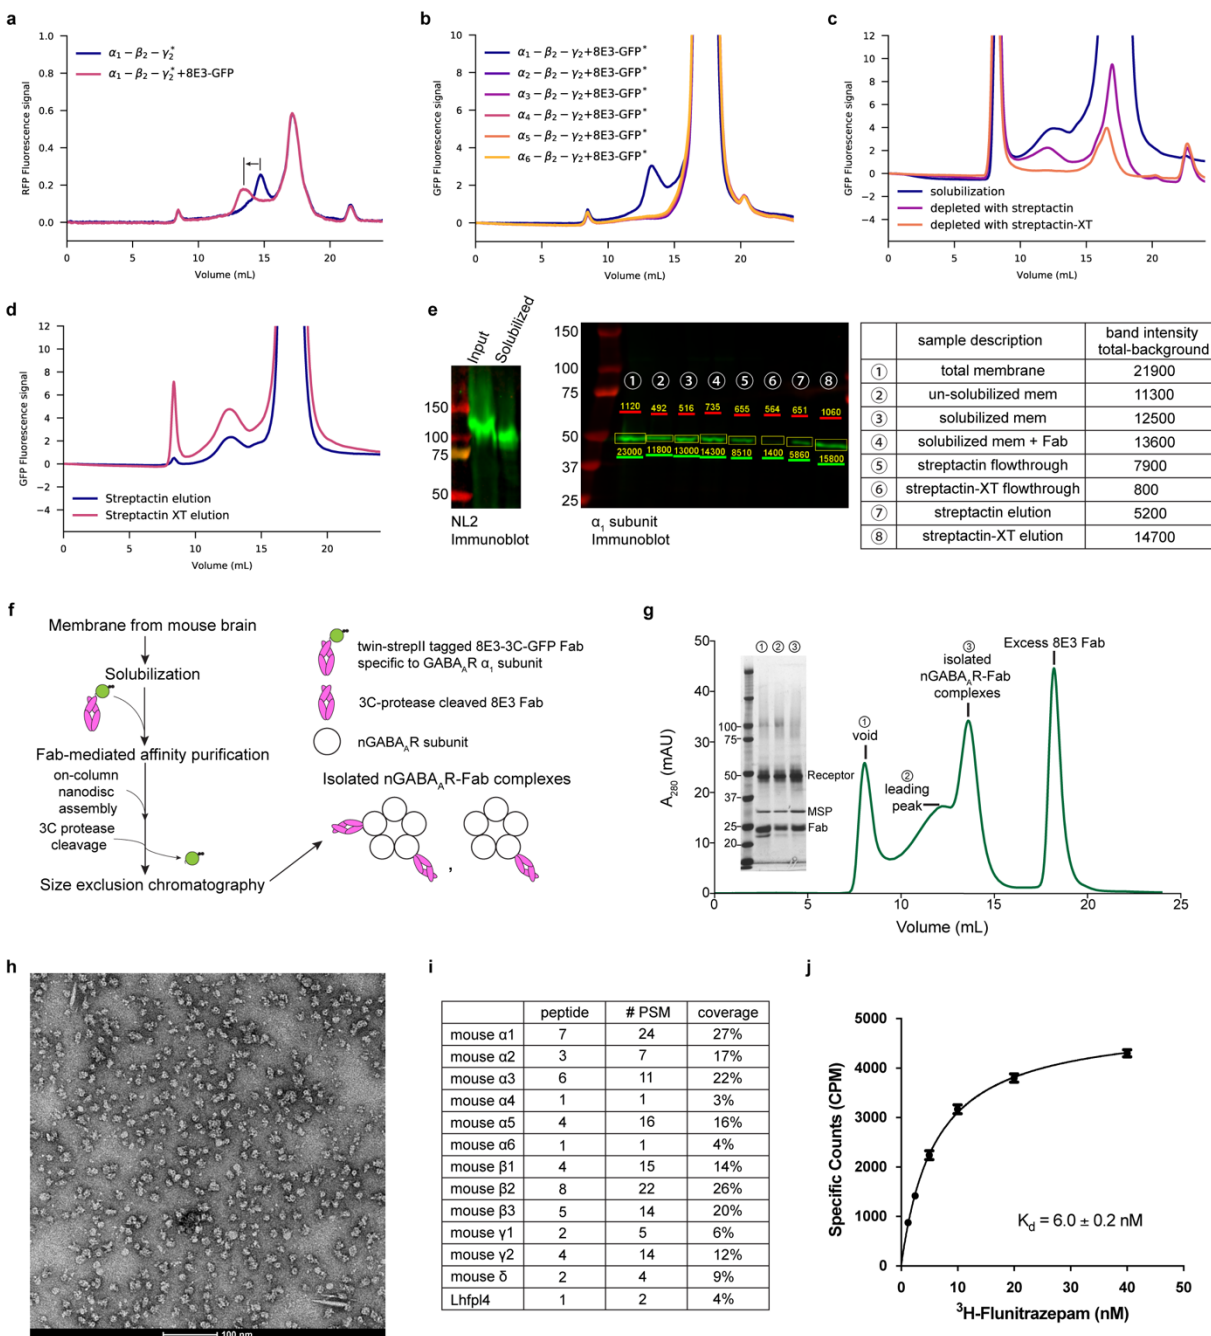

863  
 864 **Extended Data Figure 1. Biochemical characterization of native receptor isolation from**  
 865 **mouse brain using an engineered Fab fragment. a, b,** expression of tri-heteromeric GABA<sub>A</sub>Rs  
 866 with different  $\alpha$  subunits and binding test with the engineered 8E3-GFP Fab monitored with  
 867 fluorescence-detection size-exclusion chromatography (FSEC). The signal is from the fusion-red  
 868 protein inserted into the intracellular loop of the  $\gamma$ 2 subunit in panel **a** or the GFP of the 8E3-  
 869 GFP Fab in panel **b**. **c, d,** FSEC traces demonstrating the superior capturing efficiency and  
 870 protein yield of streptactin-XT resin. **e,** Western blot analysis of steps during the native receptor

871 purification. The neuroligin 2 (NL2) immunoblot shows robust solubilization of the inhibitory  
872 synapse marker NL2. The  $\alpha_1$  subunit immunoblot shows quantitation of the  $\alpha_1$  subunit during  
873 membrane solubilization, affinity capturing, and elution steps. **f**, the workflow of  $\alpha_1$ GABA<sub>A</sub>Rs  
874 purification from mouse brain. **g**, size-exclusion chromatography (SEC) of  $\alpha_1$ GABA<sub>A</sub>RS and  
875 silver-stain SDS-PAGE analysis of different SEC fractions. **h**, negative-staining electron  
876 microscopy images of protein samples from the pentameric peak. **i**, identified proteins related to  
877 GABA receptors from the pentameric peak using mass spectrometry. **j**, scintillation proximity  
878 assay of the pentameric peak fraction with <sup>3</sup>H-Flunitrazepam.

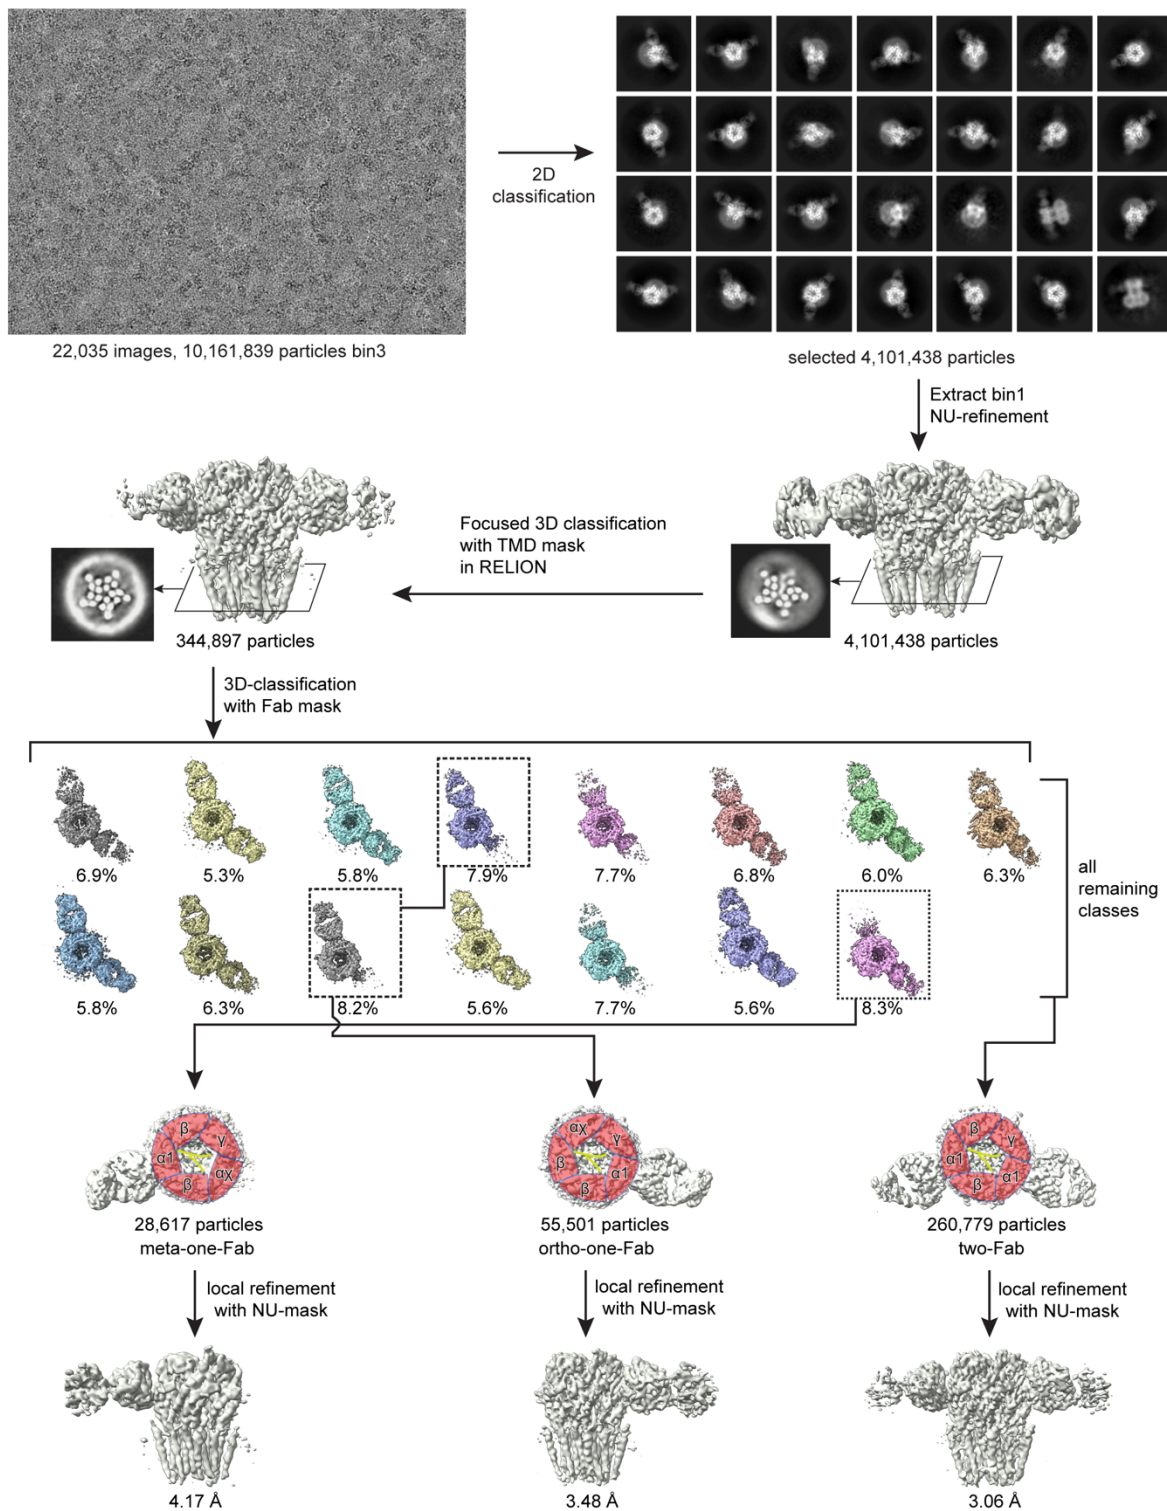

879

880 **Extended Data Figure 2. Cryo-EM data processing of the DID dataset.**

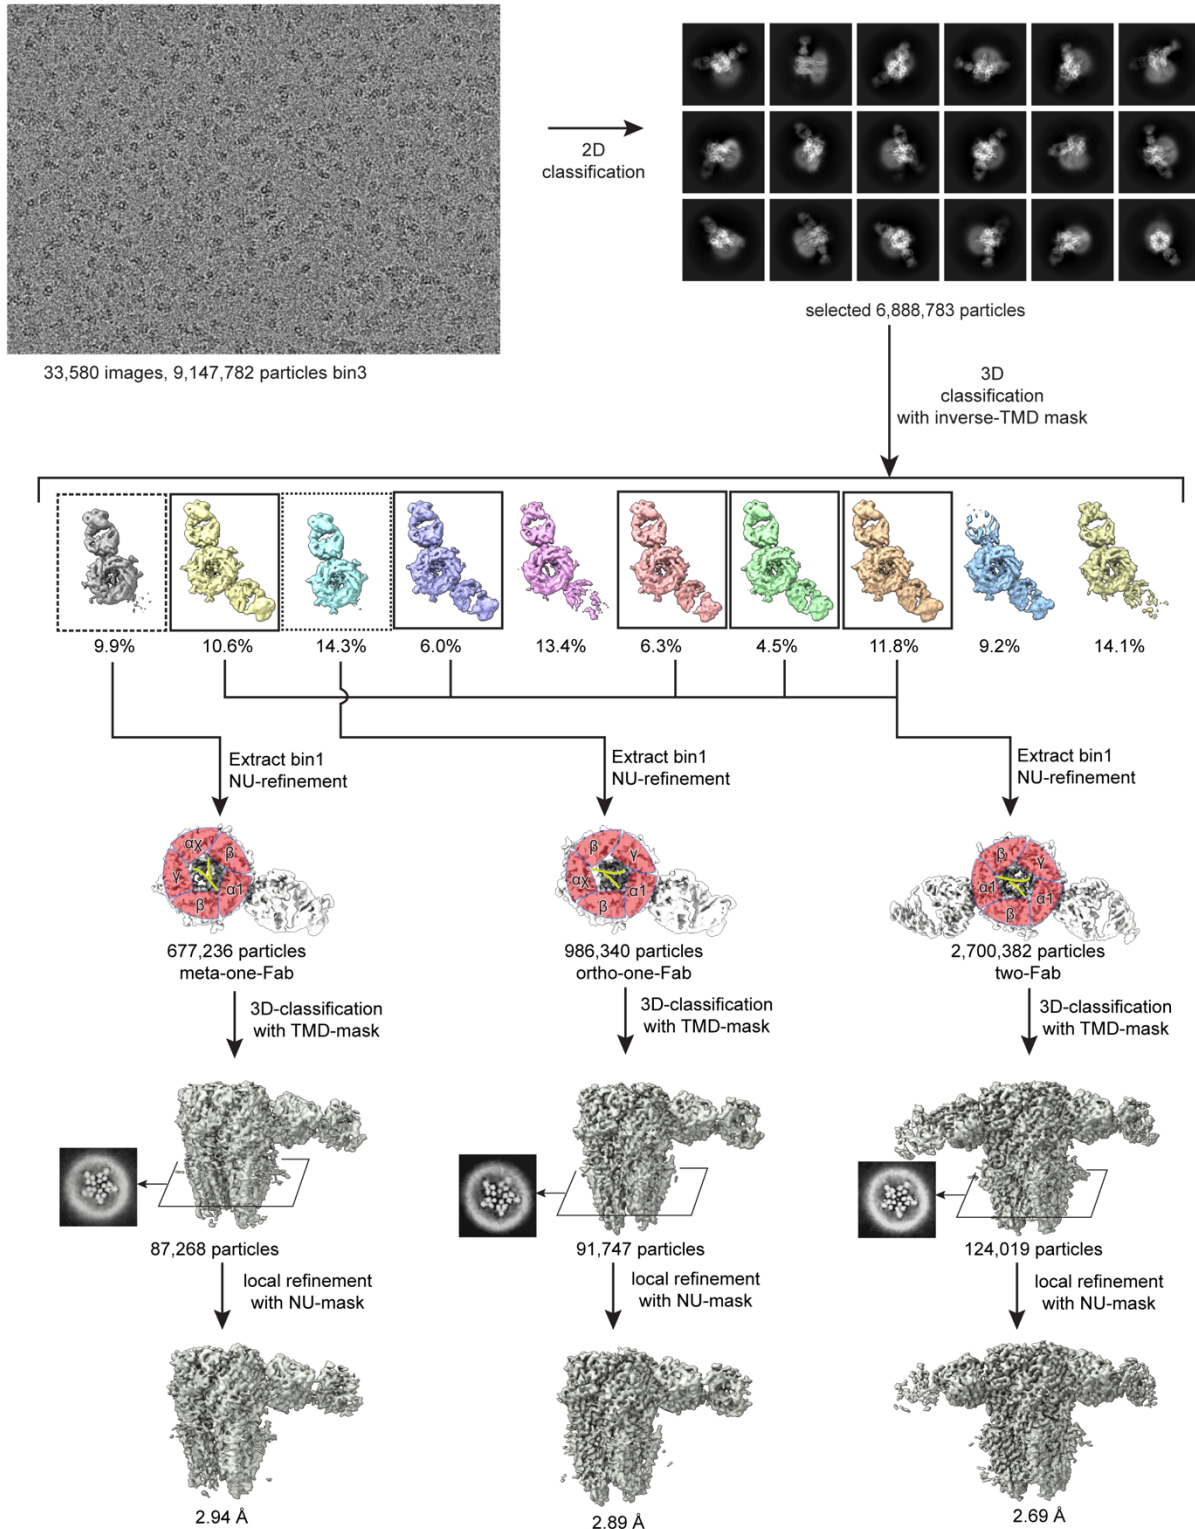

881

882 **Extended Data Figure 3. Cryo-EM data processing of the ZOL/GABA dataset.**

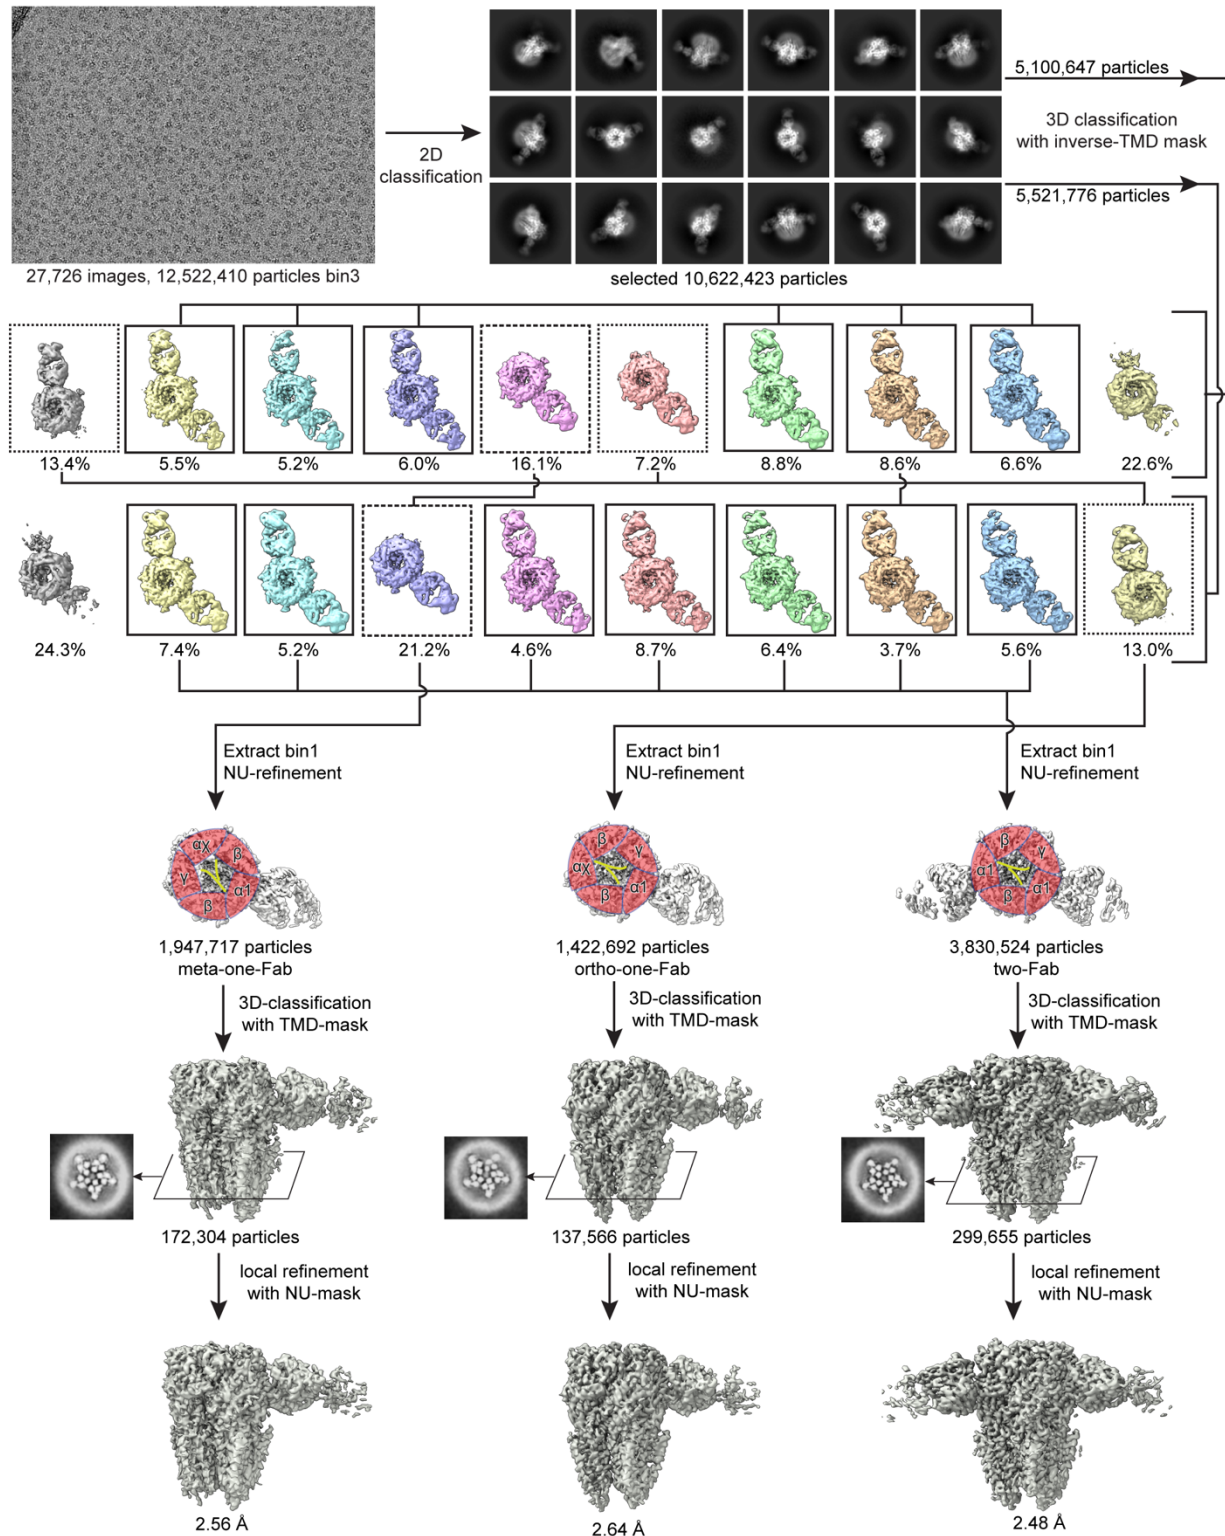

883

884 **Extended Data Figure 4. Cryo-EM data processing of the ALP/GABA dataset.**

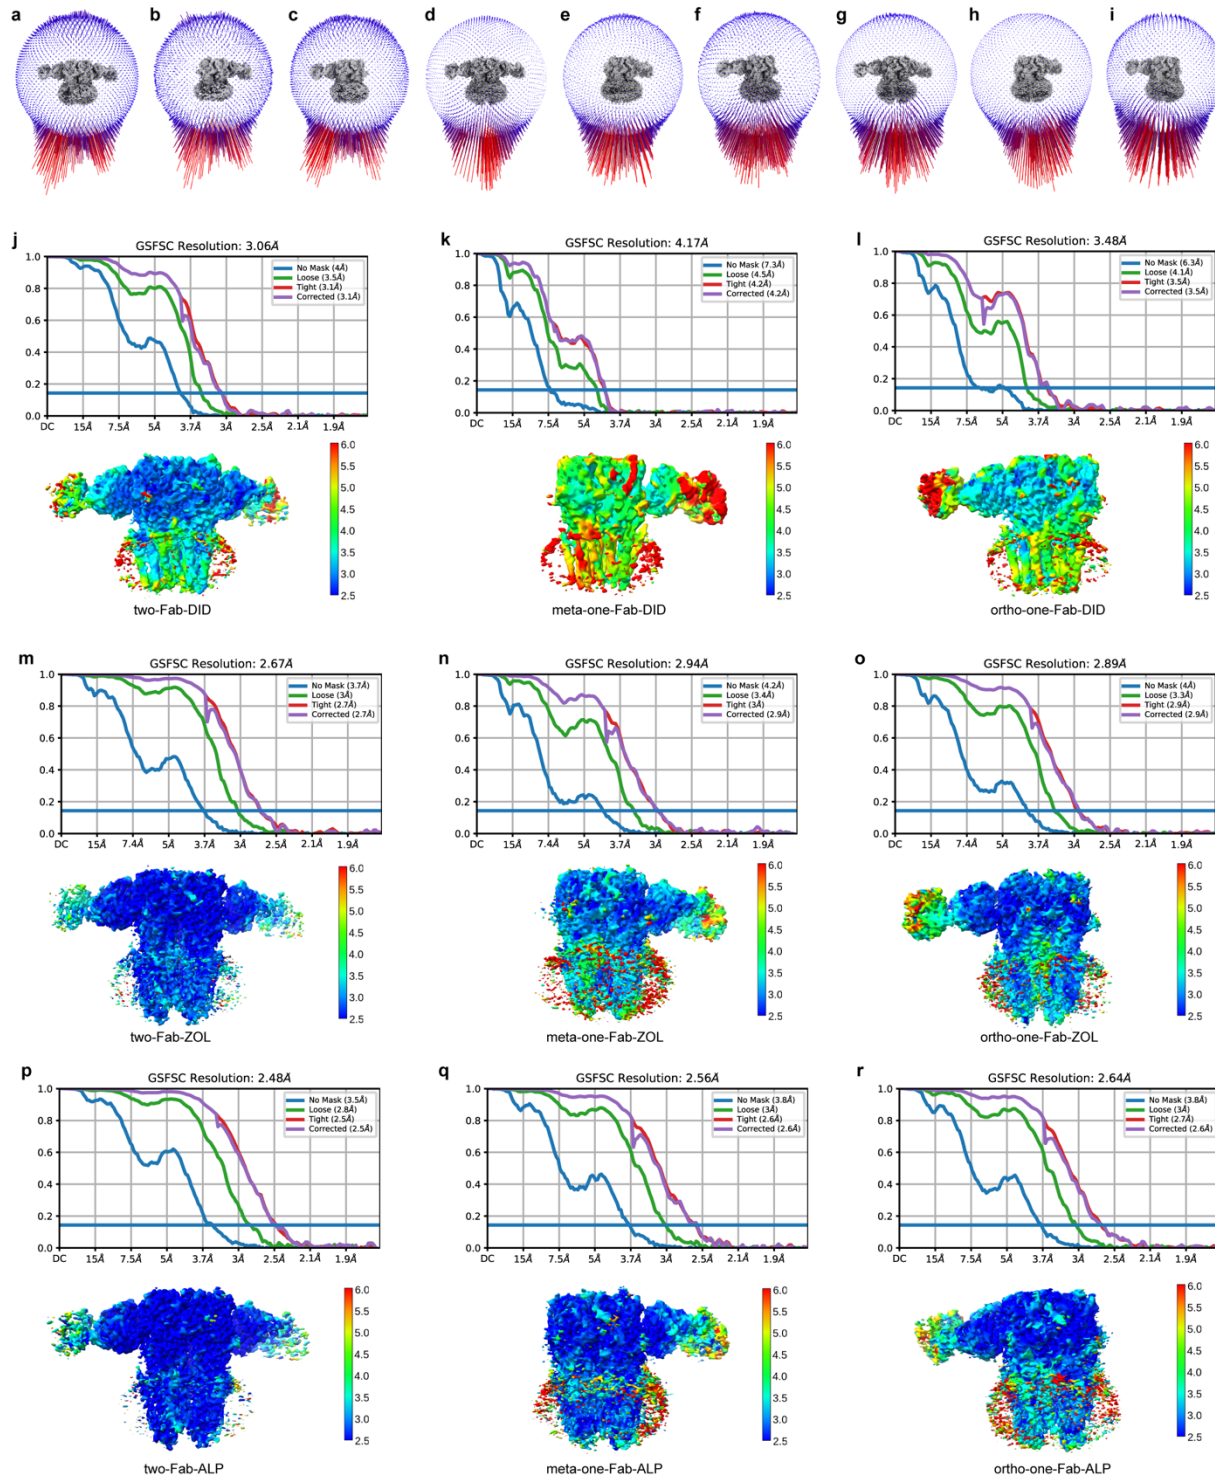

885

886

887

**Extended Data Figure 5. Statistics of final cryo-EM reconstructions. a–i**, Euler angle distributions of particles used for final cryo-EM reconstruction of two-Fab-DID (a), meta-one-

888 Fab-DID (**b**), ortho-one-Fab-DID (**c**), two-Fab-ZOL (**d**), meta-one-Fab-ZOL (**e**), ortho-one-Fab-  
889 ZOL (**f**), two-Fab-ALP (**g**), meta-one-Fab-ALP (**h**), ortho-one-Fab-ALP (**i**). **j–r**, FSC curves and  
890 local resolution plots of final cryo-EM reconstructions.

891

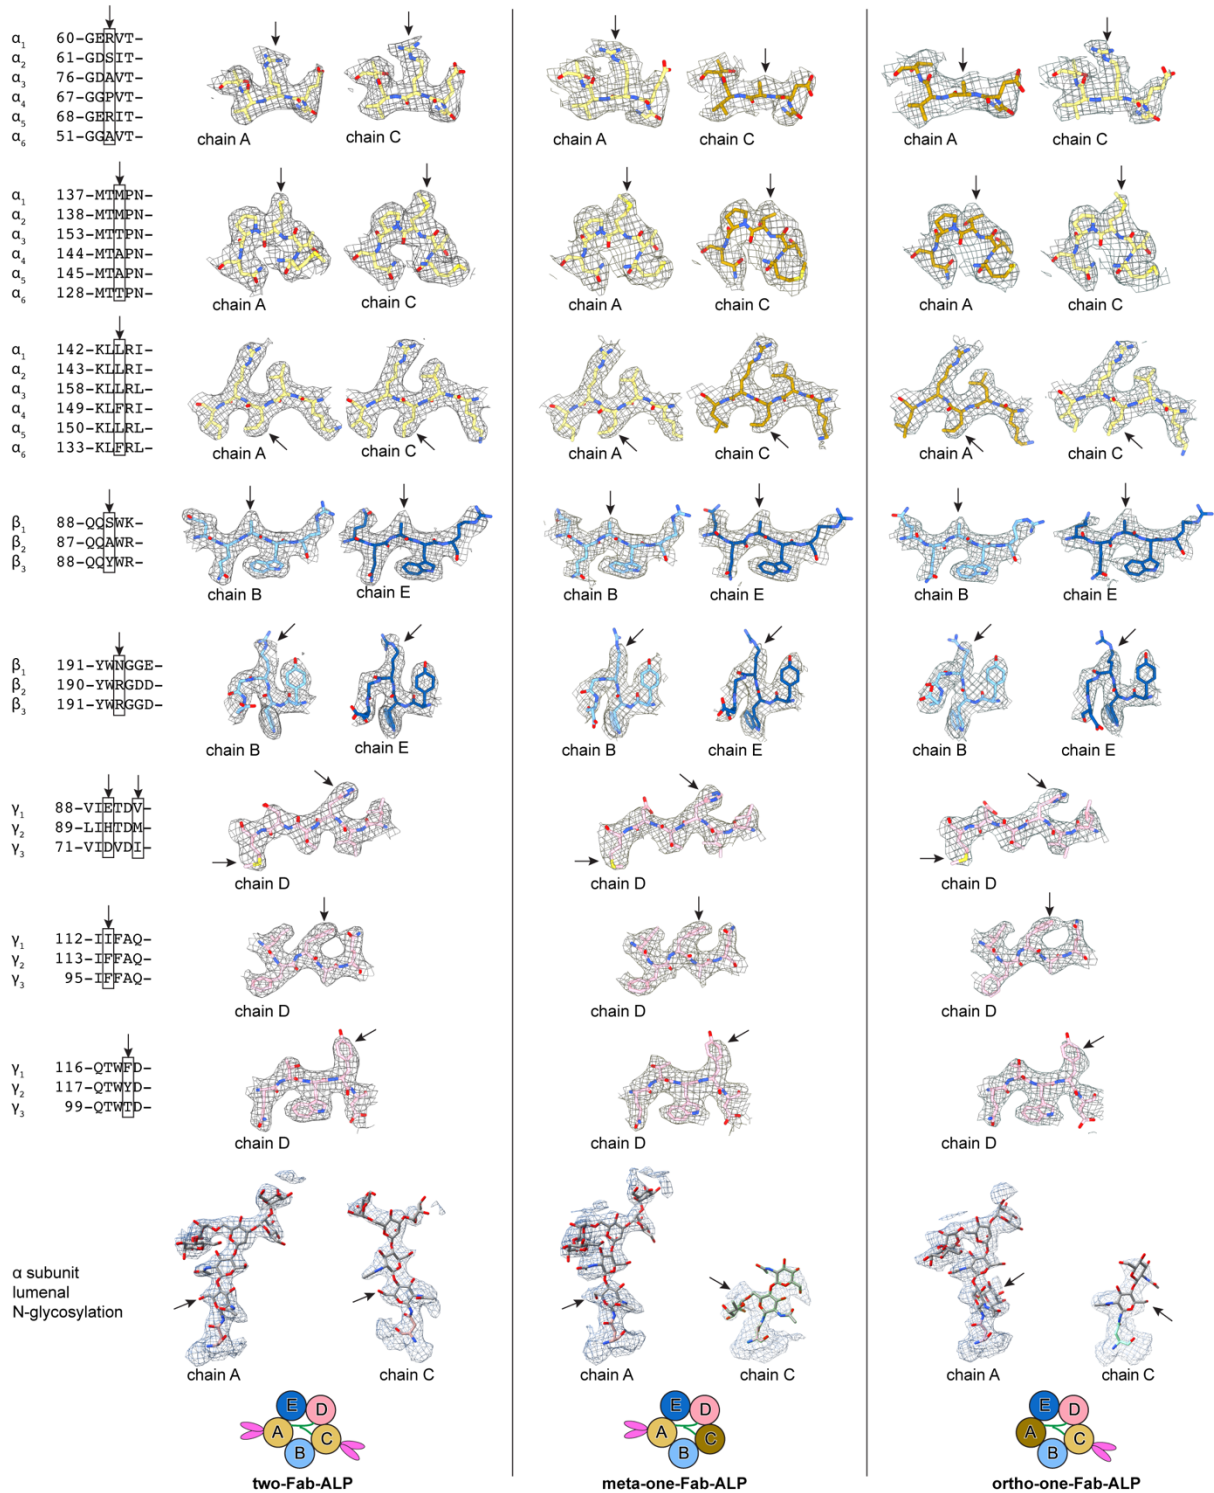

892

893 **Extended Data Figure 6. Cryo-EM densities of protein side chains and N-glycosylation used**  
 894 **for subunit identification.**



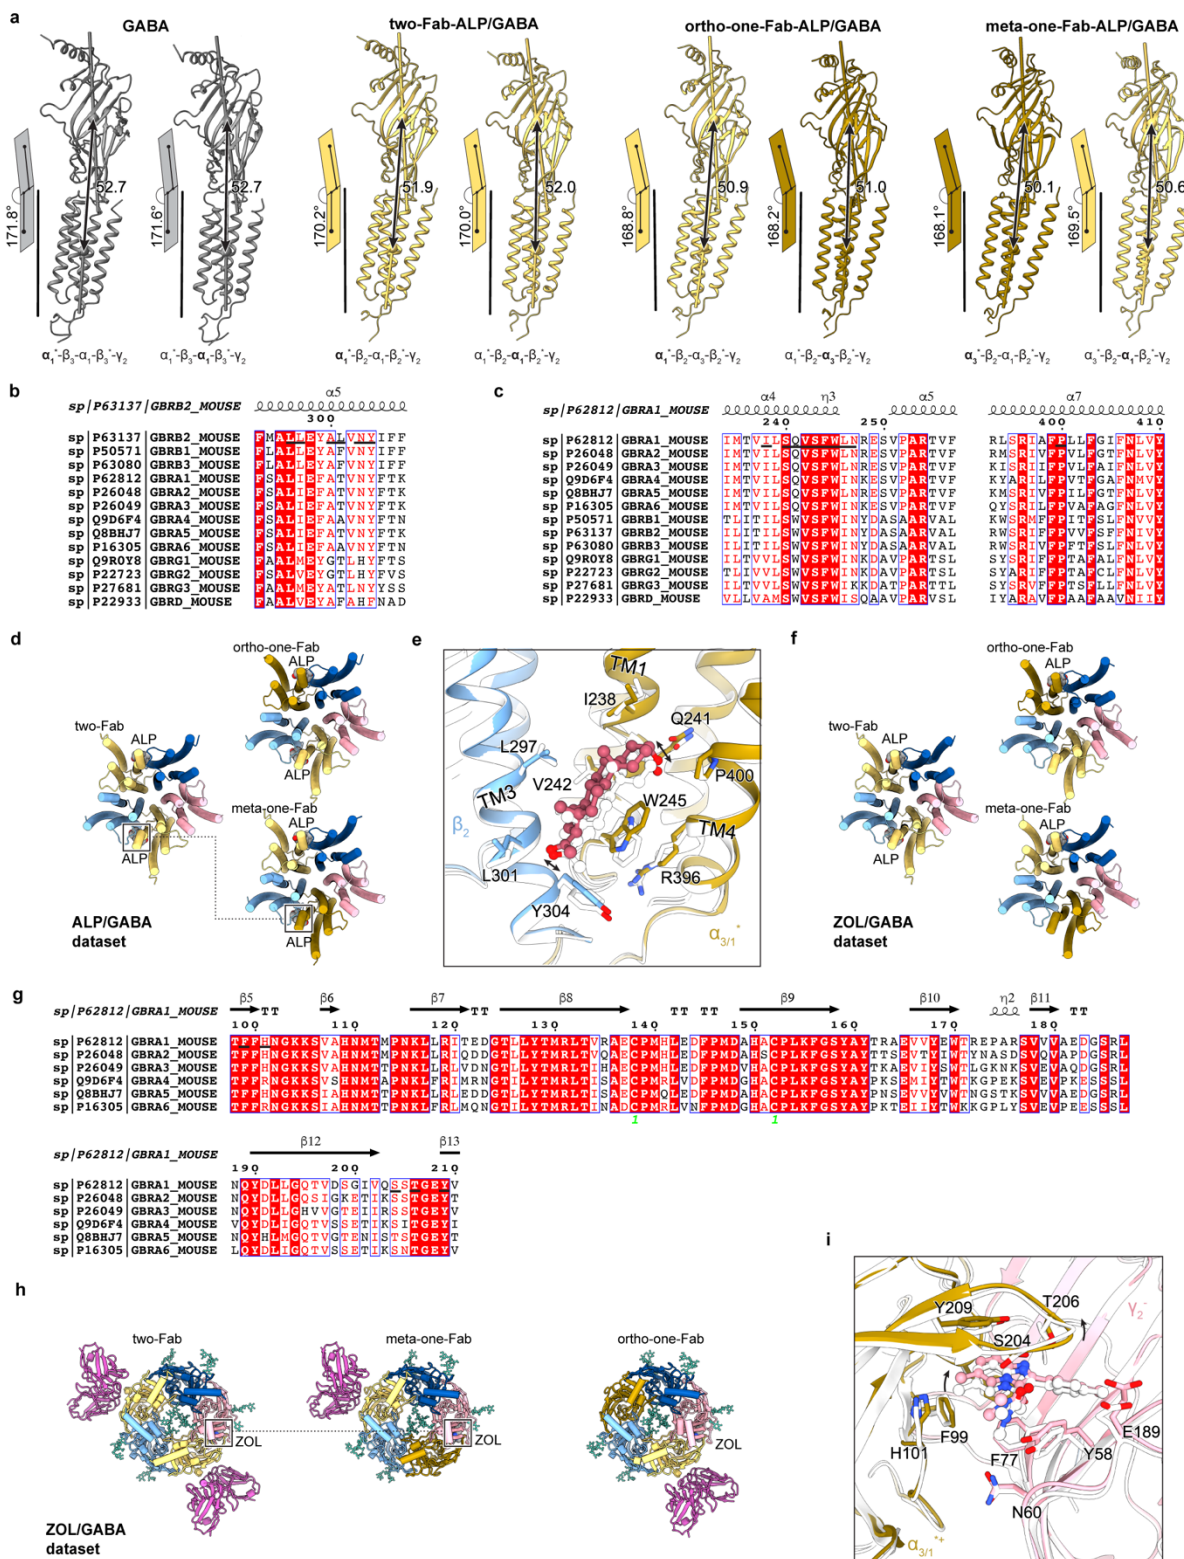

895  
 896 **Extended Data Figure 7. Sequence alignments of  $\alpha_1$ GABA<sub>A</sub>R subunits and structural**  
 897 **variations of  $\alpha_1$ GABA<sub>A</sub>R assemblies. a, differential inter-domain arrangements of  $\alpha$  subunits**

898 from the  $\alpha_1$ GABA<sub>A</sub>Rs of the ALP/GABA dataset and a previous GABA<sub>A</sub>R structure (PDB  
899 code: 6I53). **b, c**, sequence alignments of  $\alpha_1$ GABA<sub>A</sub>R subunits with sequence ranges relevant to  
900 neurosteroid binding. **d**, TMD structures from the ALP/GABA dataset with the allopregnanolone  
901 (ALP) shown in Vdw representation. **e**, structure comparison of the ALP binding pockets  
902 between two-Fab and meta-one-Fab. The two structures are overlaid based on the TMD of  
903 adjacent  $\beta$  and  $\alpha$  subunits. **f**, TMD structures from the ZOL/GABA dataset with the endogenous  
904 neurosteroid molecules shown in Vdw representation. **g**, sequence alignments of  $\alpha_1$ GABA<sub>A</sub>R  $\alpha$   
905 subunits with sequence ranges relevant to zolpidem binding. **h**, ECD structures from the  
906 ZOL/GABA dataset with the zolpidem shown in Vdw representation. **i**, structure comparison of  
907 the ZOL binding pockets between two-Fab and meta-one-Fab. The two structures are overlaid  
908 based on the ECD of adjacent  $\beta$  and  $\alpha$  subunits.

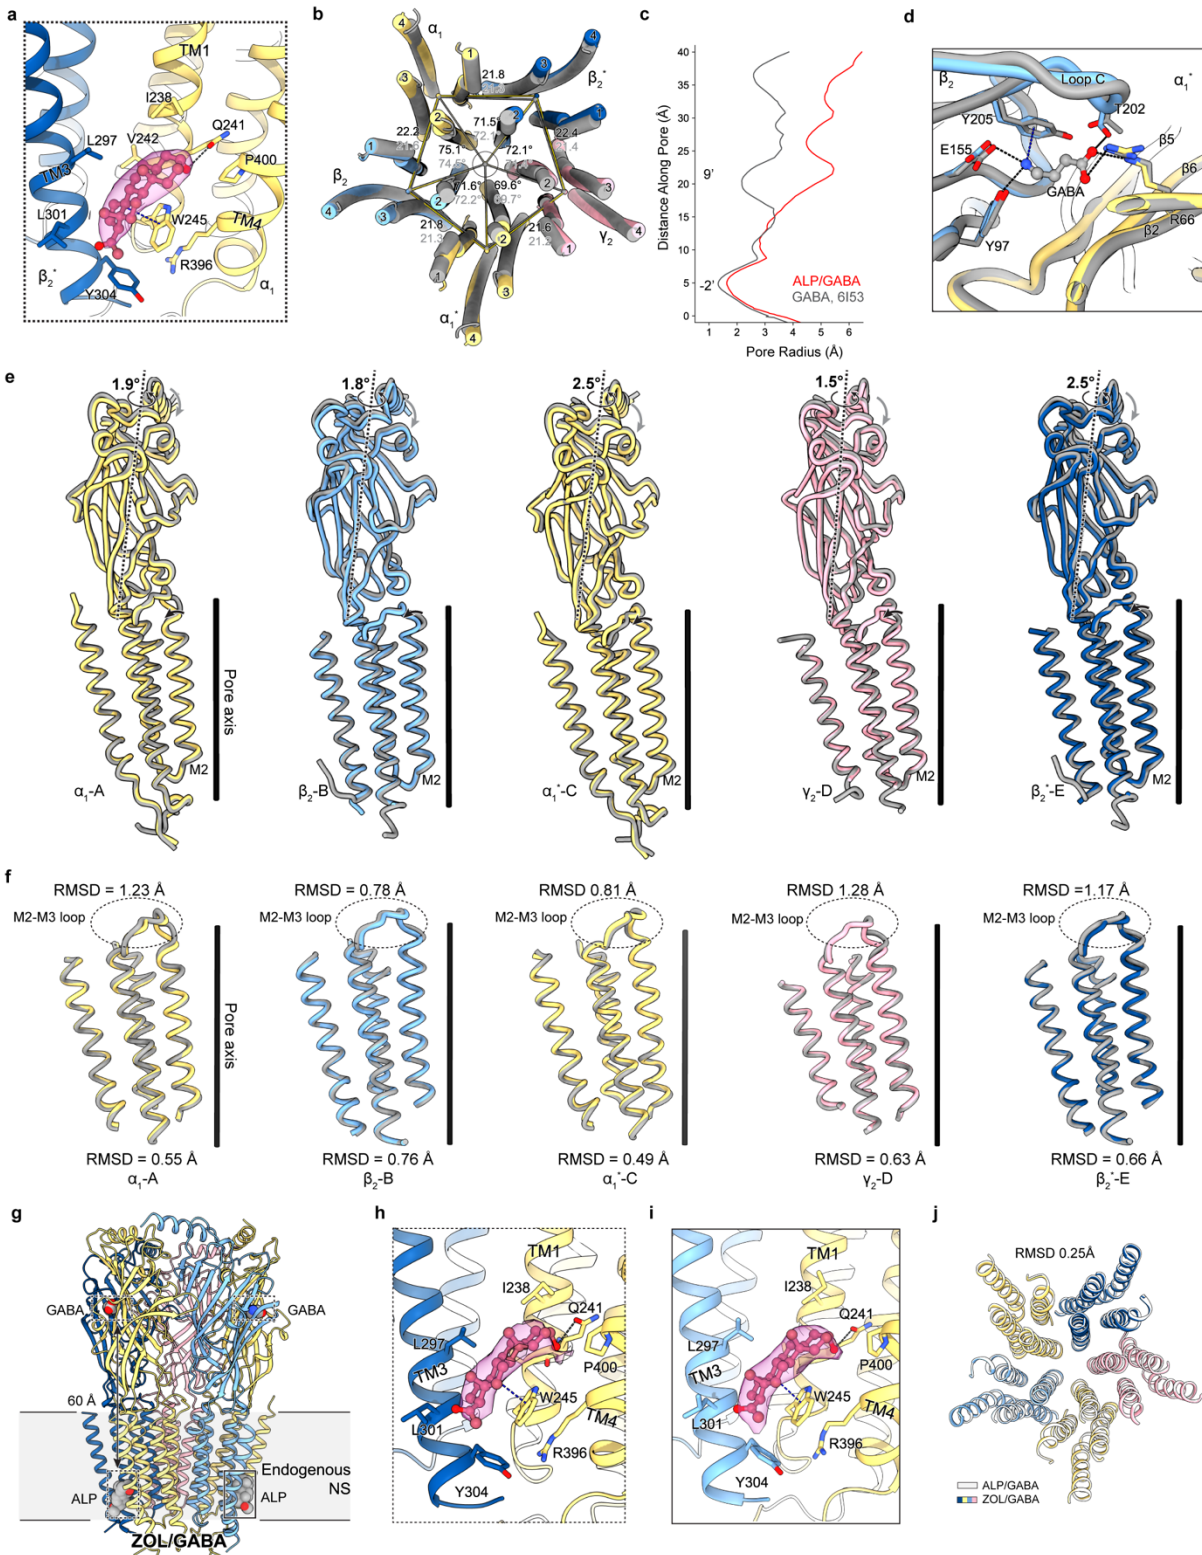

909

910 **Extended Data Figure 8. Neurosteroid binding to the  $\alpha_1$ GABA<sub>A</sub>Rs. a**, allopregnanolone  
 911 bound between the  $\beta_2^*/\alpha_1^-$  interface of the two-Fab-ALP. **b**, structural comparison between two-

912 Fab-ALP and previous structure without ALP (PDB code: 6I53, apo structure hereafter). The two  
913 structures are aligned based on the global TMD. Distances and angles formed with mass centers  
914 of TMD are also shown with those of the two-Fab-ALP colored black. **c**, comparison of pore  
915 profiles between two-Fab-ALP and previous apo structure. **d**, structural overlay of the GABA  
916 binding pocket from the two-Fab-ALP and previous apo structure. The two structures are aligned  
917 based on the ECD domains of the adjacent  $\beta$  and  $\alpha$  subunits. **e**, comparison of each subunit  
918 between two-Fab-ALP and previous apo structure based on global TMD structural alignment. **f**,  
919 comparison of each TMD between two-Fab-ALP and previous apo structure based on individual  
920 TMD structural alignment. RMSD values of the entire TMD domain and the M2-M3 loop are  
921 also shown. **g**, structural overview of the two-Fab-ZOL. Two ALP molecules are modeled based  
922 on the cryo-EM densities. **h**, **i**, binding poses of ALP in the two-Fab-ZOL structure. **j**, structural  
923 overlay of the two-Fab-ALP and two-Fab-ZOL based on the global TMD.

924

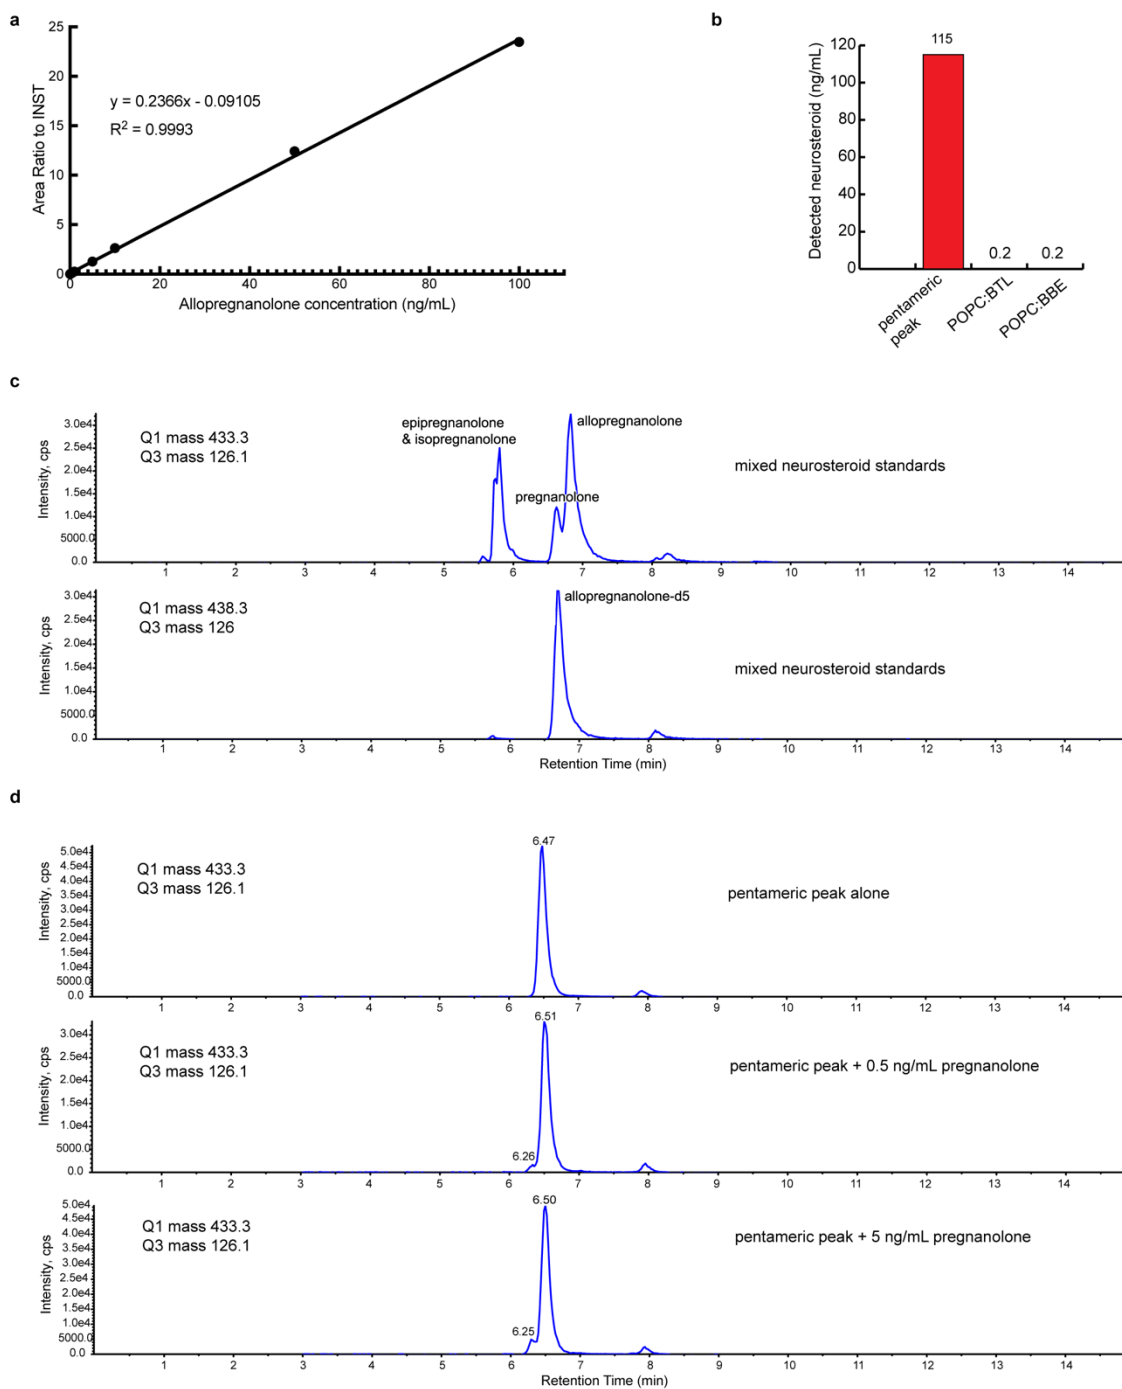

925

926 **Extended Data Figure 9. Mass spectrometry analysis of neurosteroid for the ZOL/GABA**  
927 **sample. a**, standard curve of allopregnanolone quantitation based on isotope dilution. **b**,  
928 quantitation of neurosteroid in the pentameric sample and lipid stocks (85:15 mixture of POPC  
929 with either brain total lipids or bovine brain extracts) used for on-column nanodisc  
930 reconstitution. Taking into amount of the volume, the neurosteroid from the exogenous lipid  
931 makes up only 0.3% of the detected neurosteroid in the protein sample. **c**, chromatographs of the

932 mixed neurosteroid standards under the final LC condition. **d**, chromatographs of protein sample  
933 alone or spiked with different amounts of pregnanolone standard.  
934

935 **Extended Data Table 1 | Cryo-EM data collection parameters**

936

|                                                                        | Native GABA <sub>A</sub> R<br>+ DID<br>(Endogenous GABA)<br>DID      | Native GABA <sub>A</sub> R<br>+ GABA<br>+ ZOL<br>ZOL/GABA            | Native GABA <sub>A</sub> R<br>+ GABA<br>+ ALP<br>ALP/GABA              |
|------------------------------------------------------------------------|----------------------------------------------------------------------|----------------------------------------------------------------------|------------------------------------------------------------------------|
| <b>Data collection and processing</b>                                  |                                                                      |                                                                      |                                                                        |
| Microscope                                                             | PNCC<br>Krios                                                        | PNCC<br>Krios                                                        | Janelia<br>Krios                                                       |
| Electron Gun                                                           | XFEG                                                                 | XFEG                                                                 | XFEG                                                                   |
| Voltage (kV)                                                           | 300                                                                  | 300                                                                  | 300                                                                    |
| Energy filter slit width (eV)                                          | 20                                                                   | 20                                                                   | 20                                                                     |
| Detector                                                               | K3                                                                   | K3                                                                   | K3                                                                     |
| Operation mode                                                         | non-CDS                                                              | non-CDS                                                              | CDS                                                                    |
| Flux on detector<br>(e <sup>-</sup> /pix/sec)                          | 16                                                                   | 15                                                                   | 7                                                                      |
| Total electron exposure<br>on sample (e <sup>-</sup> /Å <sup>2</sup> ) | 50                                                                   | 60                                                                   | 50                                                                     |
| Number of movie frames                                                 | 40                                                                   | 40                                                                   | 40                                                                     |
| Magnification                                                          | 105K                                                                 | 105K                                                                 | 105K                                                                   |
| Pixel size (Å)                                                         | 0.826                                                                | 0.826                                                                | 0.831                                                                  |
| Targeted defocus range (µm)                                            | 1.2–2.5                                                              | 0.8–2.1                                                              | 0.8–2.1                                                                |
| Number of collected movies                                             | 22,035                                                               | 33,580                                                               | 27,726                                                                 |
| Symmetry imposed                                                       | C1                                                                   | C1                                                                   | C1                                                                     |
| Initial particle images (no.)                                          | 10,161,839                                                           | 9,147,782                                                            | 12,522,410                                                             |
| GABA <sub>A</sub> R particle images (no.)                              | 4,101,438                                                            | 6,888,783                                                            | 11,031,705                                                             |
| Final particle images (no.)                                            | 260,779 (two-Fab)<br>55,501 (ortho-one-Fab)<br>28,617 (meta-one-Fab) | 124,019 (two-Fab)<br>91,747 (ortho-one-Fab)<br>87,268 (meta-one-Fab) | 299,655 (two-Fab)<br>137,566 (ortho-one-Fab)<br>172,304 (meta-one-Fab) |
| Map resolution (Å)                                                     | 3.06 (two-Fab)                                                       | 2.67 (two-Fab)                                                       | 2.48 (two-Fab)                                                         |
| FSC=0.143                                                              | 3.52 (ortho-one-Fab)<br>4.05 (meta-one-Fab)                          | 2.89 (ortho-one-Fab)<br>2.94 (meta-one-Fab)                          | 2.64 (ortho-one-Fab)<br>2.56 (meta-one-Fab)                            |
| EMPIAR code                                                            |                                                                      |                                                                      |                                                                        |

937

938

939 **Extended Data Table 2 | Refinement and validation statistics**

940

|                                                     | Two-Fab<br>+ DID<br>(Endogenous<br>GABA) | Two-Fab<br>+ GABA<br>+ ZOL<br>(Endogenous<br>neurosteroid) | Ortho-one-<br>Fab<br>+ GABA<br>+ ZOL<br>(Endogenous<br>neurosteroid) | Meta-one-<br>Fab<br>+ GABA<br>+ ZOL<br>(Endogenous<br>neurosteroid) | Two-Fab<br>+ GABA<br>+ ALP | Ortho-one-<br>Fab<br>+ GABA<br>+ ALP | Meta-one-<br>Fab<br>+ GABA<br>+ ALP |
|-----------------------------------------------------|------------------------------------------|------------------------------------------------------------|----------------------------------------------------------------------|---------------------------------------------------------------------|----------------------------|--------------------------------------|-------------------------------------|
| <b>EMDB ID</b>                                      | EMD-29728                                | EMD-29727                                                  | EMD-29743                                                            | EMD-29742                                                           | EMD-29350                  | EMD-29741                            | EMD-29733                           |
| <b>PDB ID</b>                                       | 8G4O                                     | 8G4N                                                       | 8G5H                                                                 | 8G5G                                                                | 8FOI                       | 8G5F                                 | 8G4X                                |
| Model resolution (Å)<br>FSC=0.143                   | 3.06                                     | 2.67                                                       | 2.89                                                                 | 2.94                                                                | 2.48                       | 2.64                                 | 2.56                                |
| Map sharpening <i>B</i> factor<br>(Å <sup>2</sup> ) | 0                                        | 0                                                          | 0                                                                    | 0                                                                   | 0                          | 0                                    | 0                                   |
| <b>Model composition</b>                            |                                          |                                                            |                                                                      |                                                                     |                            |                                      |                                     |
| Non-hydrogen atoms                                  | 17,355                                   | 18,311                                                     | 15,876                                                               | 15,861                                                              | 18,288                     | 15,753                               | 15,899                              |
| Protein residues                                    | 2,094                                    | 2,120                                                      | 1,887                                                                | 1,887                                                               | 2,120                      | 1,888                                | 1,895                               |
| Glycans (molecules)                                 | 441 (36)                                 | 441 (36)                                                   | 430 (35)                                                             | 419 (34)                                                            | 441 (36)                   | 294 (23)                             | 386 (31)                            |
| Ligands (molecules)                                 | 37 (3)                                   | 83 (5)                                                     | 60 (4)                                                               | 60 (4)                                                              | 60 (4)                     | 60 (4)                               | 60 (4)                              |
| Lipids (molecules)                                  | -                                        | 694 (41)                                                   | 94 (2)                                                               | 94 (2)                                                              | 694 (41)                   | 94 (2)                               | 94 (2)                              |
| <b>B factors (Å<sup>2</sup>)</b>                    |                                          |                                                            |                                                                      |                                                                     |                            |                                      |                                     |
| Protein                                             | 156                                      | 125                                                        | 127                                                                  | 149                                                                 | 115                        | 134                                  | 127                                 |
| Glycans                                             | 212                                      | 171                                                        | 179                                                                  | 204                                                                 | 165                        | 170                                  | 179                                 |
| Ligands                                             | 114                                      | 115                                                        | 116                                                                  | 134                                                                 | 111                        | 158                                  | 116                                 |
| Lipids                                              | -                                        | 144                                                        | 182                                                                  | 205                                                                 | 146                        | 199                                  | 172                                 |
| <b>R.m.s. deviations</b>                            |                                          |                                                            |                                                                      |                                                                     |                            |                                      |                                     |
| Bond lengths (Å)                                    | 0.003                                    | 0.003                                                      | 0.005                                                                | 0.006                                                               | 0.004                      | 0.003                                | 0.004                               |
| Bond angles (°)                                     | 0.526                                    | 0.560                                                      | 0.999                                                                | 0.764                                                               | 0.627                      | 0.676                                | 0.683                               |
| <b>Validation</b>                                   |                                          |                                                            |                                                                      |                                                                     |                            |                                      |                                     |
| MolProbity score                                    | 1.92                                     | 1.65                                                       | 1.87                                                                 | 2.27                                                                | 1.50                       | 1.71                                 | 1.78                                |
| Clashscore                                          | 5.82                                     | 5.76                                                       | 6.22                                                                 | 8.39                                                                | 3.75                       | 4.95                                 | 5.10                                |
| Poor rotamers (%)                                   | 3.45                                     | 2.24                                                       | 2.49                                                                 | 6.23                                                                | 1.97                       | 2.37                                 | 2.95                                |
| <b>Ramachandran plot</b>                            |                                          |                                                            |                                                                      |                                                                     |                            |                                      |                                     |
| Favored (%)                                         | 96.81                                    | 97.66                                                      | 96.51                                                                | 96.67                                                               | 97.47                      | 97.05                                | 97.17                               |
| Allowed (%)                                         | 3.19                                     | 2.34                                                       | 3.49                                                                 | 3.33                                                                | 2.53                       | 2.95                                 | 2.83                                |
| Disallowed (%)                                      | 0.00                                     | 0.00                                                       | 0.00                                                                 | 0.00                                                                | 0.00                       | 0.00                                 | 0.00                                |

941

942



943 **Additional references**

- 944 1 Phulera, S., Zhu, H., Yu, J., Claxton, D. P., Yoder, N., Yoshioka, C. & Gouaux, E. Cryo-  
945 EM structure of the benzodiazepine-sensitive  $\alpha 1\beta 1\gamma 2S$  tri-heteromeric GABA<sub>A</sub> receptor  
946 in complex with GABA. *eLife* **7**, e39383, (2018).
- 947 2 Goehring, A., Lee, C. H., Wang, K. H., Michel, J. C., Claxton, D. P., Bacongus, I.,  
948 Althoff, T., Fischer, S., Garcia, K. C. & Gouaux, E. Screening and large-scale expression  
949 of membrane proteins in mammalian cells for structural studies. *Nat. Protoc.* **9**, 2574–  
950 2585, (2014).
- 951 3 Grinkova, Y. V., Denisov, I. G. & Sligar, S. G. Engineering extended membrane scaffold  
952 proteins for self-assembly of soluble nanoscale lipid bilayers. *Protein Eng Des Sel* **23**,  
953 843–848, (2010).
- 954 4 Johansen, N. T., Tidemand, F. G., Nguyen, T., Rand, K. D., Pedersen, M. C. & Arleth, L.  
955 Circularized and solubility-enhanced MSPs facilitate simple and high-yield production of  
956 stable nanodiscs for studies of membrane proteins in solution. *FEBS J.* **286**, 1734–1751,  
957 (2019).
- 958 5 Zhu, H. & Gouaux, E. Architecture and assembly mechanism of native glycine receptors.  
959 *Nature* **599**, 513–517, (2021).
- 960 6 Jain, A., Liu, R., Xiang, Y. K. & Ha, T. Single-molecule pull-down for studying protein  
961 interactions. *Nat. Protoc.* **7**, 445–452, (2012).
- 962 7 Punjani, A., Rubinstein, J. L., Fleet, D. J. & Brubaker, M. A. cryoSPARC: algorithms for  
963 rapid unsupervised cryo-EM structure determination. *Nat. Methods* **14**, 290–296, (2017).
- 964 8 Asarnow, D., Palovcak, E. & Cheng, Y. UCSF pyem v0.5. Zenodo,  
965 <https://doi.org/10.5281/zenodo.3576630>, (2019).
- 966 9 Fernandez-Leiro, R. & Scheres, S. H. W. A pipeline approach to single-particle  
967 processing in RELION. *Acta Crystallogr D Struct Biol* **73**, 496–502, (2017).
- 968 10 Kim, J. J., Gharpure, A., Teng, J., Zhuang, Y., Howard, R. J., Zhu, S., Noviello, C. M.,  
969 Walsh, R. M., Lindahl, E. & Hibbs, R. E. Shared structural mechanisms of general  
970 anaesthetics and benzodiazepines. *Nature* **585**, 303–308, (2020).
- 971 11 Pettersen, E. F., Goddard, T. D., Huang, C. C., Couch, G. S., Greenblatt, D. M., Meng, E.  
972 C. & Ferrin, T. E. UCSF Chimera--a visualization system for exploratory research and  
973 analysis. *J. Comput. Chem.* **25**, 1605–1612, (2004).
- 974 12 Jakobi, A. J., Wilmanns, M. & Sachse, C. Model-based local density sharpening of cryo-  
975 EM maps. *elife* **6**, e27131, (2017).
- 976 13 Sanchez-Garcia, R., Gomez-Blanco, J., Cuervo, A., Carazo, J. M., Sorzano, C. O. S. &  
977 Vargas, J. DeepEMhancer: a deep learning solution for cryo-EM volume post-processing.  
978 *Commun Biol* **4**, 874, (2021).
- 979 14 Jumper, J., Evans, R., Pritzel, A., Green, T., Figurnov, M., Ronneberger, O.,  
980 Tunyasuvunakool, K., Bates, R., Žídek, A., Potapenko, A., Bridgland, A., Meyer, C.,  
981 Kohl, S. A. A., Ballard, A. J., Cowie, A., Romera-Paredes, B., Nikolov, S., Jain, R.,  
982 Adler, J., Back, T., Petersen, S., Reiman, D., Clancy, E., Zielinski, M., Steinegger, M.,  
983 Pacholska, M., Berghammer, T., Bodenstein, S., Silver, D., Vinyals, O., Senior, A. W.,  
984 Kavukcuoglu, K., Kohli, P. & Hassabis, D. Highly accurate protein structure prediction  
985 with AlphaFold. *Nature* **596**, 583–589, (2021).
- 986 15 Alford, R. F., Leaver-Fay, A., Jeliaskov, J. R., O'Meara, M. J., DiMaio, F. P., Park, H.,  
987 Shapovalov, M. V., Renfrew, P. D., Mulligan, V. K., Kappel, K., Labonte, J. W., Pacella,  
988 M. S., Bonneau, R., Bradley, P., Dunbrack, R. L., Jr., Das, R., Baker, D., Kuhlman, B.,

- 989 Kortemme, T. & Gray, J. J. The Rosetta all-atom energy function for macromolecular  
990 modeling and design. *J. Chem. Theory Comput.* **13**, 3031–3048, (2017).
- 991 16 Emsley, P., Lohkamp, B., Scott, W. G. & Cowtan, K. Features and development of Coot.  
992 *Acta Crystallogr. D Biol. Crystallogr.* **66**, 486–501, (2010).
- 993 17 Moriarty, N. W., Grosse-Kunstleve, R. W. & Adams, P. D. electronic Ligand Builder and  
994 Optimization Workbench (eLBOW): a tool for ligand coordinate and restraint generation.  
995 *Acta Crystallogr. D Biol. Crystallogr.* **65**, 1074–1080, (2009).
- 996 18 Afonine, P. V., Poon, B. K., Read, R. J., Sobolev, O. V., Terwilliger, T. C., Urzhumtsev,  
997 A. & Adams, P. D. Real-space refinement in PHENIX for cryo-EM and crystallography.  
998 *Acta Crystallogr D Struct Biol* **74**, 531–544, (2018).
- 999 19 Pettersen, E. F., Goddard, T. D., Huang, C. C., Meng, E. C., Couch, G. S., Croll, T. I.,  
1000 Morris, J. H. & Ferrin, T. E. UCSF ChimeraX: Structure visualization for researchers,  
1001 educators, and developers. *Protein Sci.* **30**, 70–82, (2021).
- 1002 20 Nicholls, R. A., Fischer, M., McNicholas, S. & Murshudov, G. N. Conformation-  
1003 independent structural comparison of macromolecules with ProSMART. *Acta*  
1004 *Crystallogr. D Biol. Crystallogr.* **70**, 2487–2499, (2014).

1005
